# Supplementary material for: Ensemble-Based Virtual Screening Led to the Discovery of Novel Lead Molecules as Potential NMBAs
Source: MDPI journal article supplement (doi:10.3390/molecules29091955), 2024-04-24
Supplement: s1 [file s1]

# Ensemble-Based Virtual Screening Led to the Discovery of Novel Lead Molecules as Potential NMBA

Yi Zhang <sup>1,2</sup>, Gonghui Ge <sup>3</sup>, Xiangyang Xu <sup>2,\*</sup> and Jinhui Wu <sup>1,\*</sup>

<sup>1</sup> School of Medicine, Nanjing University, Nanjing 210093, China

<sup>2</sup> Jiangsu Key Laboratory of Central Nervous System Drug Research and Development, Jiangsu Nhwa Pharmaceutical Co., Ltd., Xuzhou 221116, China

<sup>3</sup> School of Pharmacy, China Medical University, Shenyang 110122, China

\* Correspondence: xuxiangyang@nhwa-group.com (X.X.); wuj@nju.edu.cn (J.W.)

**Table S1.** The NMBA database collected from the literature and used in molecular property filters.

| Compound        | Formula       | SMILES                                                                                                                                             | DOI                                | M.W. | Charge | logP   |
|-----------------|---------------|----------------------------------------------------------------------------------------------------------------------------------------------------|------------------------------------|------|--------|--------|
| Patel1996-7     | C52H68N2O8    | <chem>O=C(CC/C=C/CCC(OCCC[N+](C)CC(C=C(OC)C(OC)=C2)=C2C(CC3=CC=CC=C3)C1)=O)OCCC[N+](C)CC5=CC(OC)=C(OC)C=C5C(CC6=CC=CC=C6)C4</chem>                 | 10.1016/0928-0987(95)00032-1       | 848  | +2     | 4.036  |
| Patel1996-8     | C52H66F2N2O8  | <chem>O=C(CC/C=C/CCC(OCCC[N+](C)CC(C=C(OC)C(OC)=C2)=C2C(CC3=CC(F)=CC=C3)C1)=O)OCCC[N+](C)CC5=CC(OC)=C(OC)C=C5C(CC6=CC(F)=CC=C6)C4</chem>           | 10.1016/0928-0987(95)00032-1       | 884  | +2     | 4.322  |
| Patel1996-9     | C52H66Cl2N2O8 | <chem>O=C(CC/C=C/CCC(OCCC[N+](C)CC(C=C(OC)C(OC)=C2)=C2C(CC3=CC=C(Cl)C=C3)C1)=O)OCCC[N+](C)CC5=CC(OC)=C(OC)C=C5C(CC6=CC=C(Cl)C=C6)C4</chem>         | 10.1016/0928-0987(95)00032-1       | 916  | +2     | 5.462  |
| Patel1996-10    | C56H76N2O12   | <chem>O=C(CC/C=C/CCC(OCCC[N+](C)CC(C=C(OC)C(OC)=C2)=C2C(CC3=CC(OC)=C(OC)C=C3)C1)=O)OCCC[N+](C)CC5=CC(OC)=C(OC)C=C5C(CC6=CC(OC)=C(OC)C=C6)C4</chem> | 10.1016/0928-0987(95)00032-1       | 968  | +2     | 3.352  |
| Brittain1977-1a | C28H24N6      | <chem>C[N+](C)C(N(N=N)N2C(C=CC=C3)=C3[N+](C)=C2C4=CC=CC=C4)C5=C1C=CC=C5)C6=CC=CC=C6</chem>                                                         | 10.1111/j.1476-5381.1977.tb09738.x | 444  | +2     | -2.696 |
| Brittain1977-1b | C30H28N6      | <chem>C[N+](C)C(N(N=N)N2C(C=CC=C3)=C3[N+](C)=C2C4=CC=C(C)C=C4)C5=C1C=CC=C5)C6=CC=C(C)C=C6</chem>                                                   | 10.1111/j.1476-5381.1977.tb09738.x | 472  | +2     | -1.698 |
| Brittain1977-1c | C30H28N6O2    | <chem>C[N+](C)C(N(N=N)N2C(C=CC=C3)=C3[N+](C)=C2C4=CC=C(OC)C=C4)C5=C1C=CC=C5)C6=CC=C(OC)C=C6</chem>                                                 | 10.1111/j.1476-5381.1977.tb09738.x | 504  | +2     | -2.598 |
| Ginsburg1971-3  | C27H30NO2     | <chem>O=C(OCC[N+](C)C(C)C(C=CC=C2)=C2C3=C1C=CC=C3)CC4=CC=CC=C4</chem>                                                                              | 10.1111/j.1476-5381.1971.tb07161.x | 400  | +1     | 2.890  |
| Ginsburg1971-5  | C21H26N3O6    | <chem>O=C(OCC[N+](C)C(C)C(C1=CC=C([N+](C)C([O-])=O)C=C1)CC2=CC=C([N+](C)C([O-])=O)C=C2</chem>                                                      | 10.1111/j.1476-5381.1971.tb07161.x | 416  | +1     | 1.042  |
| Ginsburg1971-9  | C26H46N2O4    | <chem>O=C(OCC[N+](C)C(C)C(C)CC1=C(C(C(OCC[N+](C)C(C)C(C)C)=O)C=CC=C1</chem>                                                                        | 10.1111/j.1476-5381.1971.tb07161.x | 450  | +2     | -2.712 |
| Ginsburg1971-11 | C26H46N2O4    | <chem>O=C(OCC[N+](C)C(C)C(C)CC1=CC(C(C(OCC[N+](C)C(C)C(C)C)=O)C=CC=C1</chem>                                                                       | 10.1111/j.1476-5381.1971.tb07161.x | 450  | +2     | -2.662 |
| Ginsburg1971-12 | C20H34N2O4    | <chem>O=C(OCC[N+](C)C(C)C(C)CC1=CC=C(C(C(OCC[N+](C)C(C)C(C)C)=O)C=C1</chem>                                                                        | 10.1111/j.1476-5381.1971.tb07161.x | 366  | +2     | -5.836 |

|                        |               |                                                                                                                                                                    |                                    |      |    |        |
|------------------------|---------------|--------------------------------------------------------------------------------------------------------------------------------------------------------------------|------------------------------------|------|----|--------|
| <b>Ginsburg1971-13</b> | C26H46N2O4    | <chem>O=C(OCC[N+](CC)(CC)CC)CC1=CC=C(CC(OCC[N+](CC)(CC)CC)=O)C=C1</chem>                                                                                           | 10.1111/j.1476-5381.1971.tb07161.x | 450  | +2 | -2.662 |
| <b>Ginsburg1971-15</b> | C28H30NO2     | <chem>O=C(OCC[N+](CC)(CC)C1C(C=CC=C2)=C2C3=C1C=CC=C3)/C=C/C/C4=CC=CC=C4</chem>                                                                                     | 10.1111/j.1476-5381.1971.tb07161.x | 412  | +1 | 3.416  |
| <b>Ginsburg1971-17</b> | C28H29ClNO2   | <chem>O=C(OCC[N+](CC)(CC)C1C(C=CC=C2)=C2C3=C1C=CC=C3)/C=C/C/C4=CC=C(Cl)C=C4</chem>                                                                                 | 10.1111/j.1476-5381.1971.tb07161.x | 446  | +1 | 4.139  |
| <b>Ginsburg1971-19</b> | C28H29N2O4    | <chem>O=C(OCC[N+](CC)(CC)C1C(C=CC=C2)=C2C3=C1C=CC=C3)/C=C/C/C4=C([N+])([O-])C=CC=C4</chem>                                                                         | 10.1111/j.1476-5381.1971.tb07161.x | 457  | +1 | 3.169  |
| <b>Ginsburg1971-21</b> | C28H29N2O4    | <chem>O=C(OCC[N+](CC)(CC)C1C(C=CC=C2)=C2C3=C1C=CC=C3)/C=C/C/C4=CC([N+])([O-])C=CC=C4</chem>                                                                        | 10.1111/j.1476-5381.1971.tb07161.x | 457  | +1 | 3.169  |
| <b>Ginsburg1971-23</b> | C28H29N2O4    | <chem>O=C(OCC[N+](C1C(C=CC=C2)=C2C3=C1C=CC=C3)(CC)CC)/C=C/C/C4=CC=C([N+])([O-])C=C4</chem>                                                                         | 10.1111/j.1476-5381.1971.tb07161.x | 457  | +1 | 3.169  |
| <b>Ginsburg1971-25</b> | C28H32NO2     | <chem>O=C(OCC[N+](CC)(C1C(C=CC=C2)=C2C3=C1C=CC=C3)CC)CC=C4=CC=CC=C4</chem>                                                                                         | 10.1111/j.1476-5381.1971.tb07161.x | 414  | +1 | 3.367  |
| <b>Boros1999-1</b>     | C54H71ClN2O14 | <chem>C[N@+](C@H)1CC2=CC(OC)=C(OC)C(OC)=C2)(CCCCOC/C=C(Cl)/C(OCCC[N@+])3(C)CCC(C=C(OC)C(OC)=C4)=C4[C@H]3CC5=CC(OC)=C(OC)C(OC)=C5)=O)OCCC6=C1C=C(OC)C(OC)=C6</chem> | 10.1021/jm990060j                  | 1006 | +2 | 2.600  |
| <b>Boros1999-2</b>     | C52H67ClN2O14 | <chem>C[N@+](CCCCOC/C=C(C(OCCC[N@+])1(C)CCC2=C(C=C(C(OC)=C2)OC)[C@H]1C3=CC(OC)=C(OC)C(OC)=C3)=O)Cl)=O)(CCC4=C5C=C(C(OC)=C4)OC)[C@H]5C6=CC(OC)=C(C(OC)=C6)OC</chem> | 10.1021/jm990060j                  | 978  | +2 | 1.842  |
| <b>Boros1999-3</b>     | C52H68N2O14   | <chem>C[N@+](CCCCOC/C=C/C(OCCC[N@+])1(C)CCC2=C(C=C(C(OC)=C2)OC)[C@H]1C3=CC(OC)=C(OC)C(OC)=C3)=O)O)(CCC4=C5C=C(C(OC)=C4)OC)[C@H]5C6=CC(OC)=C(C(OC)=C6)OC</chem>     | 10.1021/jm990060j                  | 944  | +2 | 1.189  |
| <b>Boros1999-6a</b>    | C53H69ClN2O14 | <chem>C[N@+](C@H)1(C=C2OC)=CC(OC)=C2OC)C(C(C1)=C3)=CC(OC)=C3OC)CCCCOC/C=C(Cl)/C(OCCC[N@+])(CCC4=CC(OC)=C5OC)C)[C@H](C4=C5)CC(C=C6OC)=CC(OC)=C6OC)=O)=O</chem>      | 10.1021/jm990060j                  | 992  | +2 | 2.221  |
| <b>Boros1999-4</b>     | C52H67ClN2O14 | <chem>C[N@+](C@H)1C2=CC(OC)=C(OC)C(OC)=C2)(CCCCOC/C=C(Cl)/C(OCCC[N@+])3(C)CCC(C=C(OC)C(OC)=C4)=C4[C@H]3C5=CC(OC)=C(OC)C(OC)=C5)=O)OCCC6=C1C=C(OC)C(OC)=C6</chem>   | 10.1021/jm990060j                  | 978  | +2 | 1.842  |
| <b>Laudexium</b>       | C52H74N2O8    | <chem>C[N+](CCCCCCCCC[N+])2(C)C(CC3=CC=C(OC)C(OC)=C3)C(C=C(OC)C(OC)=C4)=C4CC2)C(CC5=CC(OC)=C(OC)C=C5)C6=C(C(OC)=C(OC)C=C6CC1</chem>                                | 10.1002/med.20036                  | 854  | +2 | 3.578  |
| <b>Atracurium</b>      | C53H72N2O12   | <chem>C[N+](CCC(OCCCCCOC(C[N+])2(C)C(CC3=CC=C(OC)C(OC)=C3)C(C=C(OC)C(OC)=C4)=C4CC2)=O)O)C(CC5=CC(OC)=C(OC)C=C5)C6=CC(OC)=C(OC)C=C6CC1</chem>                       | 10.1002/med.20036                  | 928  | +2 | 3.497  |
| <b>Mivacurium</b>      | C58H80N2O14   | <chem>COC(C(OC)=C1)=C(OC)C=C1CC2[N+](C)(CCCCOC(CC/C=C/CCC(OCCC[N+])3(C)C(CC4=CC(OC)=C(OC)C(OC)=C4)C5=CC(OC)=C(OC)C=C5CC3)=O)O)CCC6=C2C=C(OC)C(OC)=C6</chem>        | 10.1002/med.20036                  | 1028 | +2 | 2.636  |
| <b>Doxacurium</b>      | C56H78N2O16   | <chem>COC1=CC(CC2C3=C(C(OC)=C(C=C3CC[N+])2(CCCOC(CCC(OCC[N+])4(CCC5=CC(OC)=C(C(OC)=C5C4CC6=CC(OC)=C(C(OC)=</chem>                                                  | 10.1002/med.20036                  | 1034 | +2 | 1.042  |

|                       |                 |                                                                                                                                                                                |                   |      |    |       |
|-----------------------|-----------------|--------------------------------------------------------------------------------------------------------------------------------------------------------------------------------|-------------------|------|----|-------|
|                       |                 | <chem>C6)OC)OC)C=O)=O)C)OC)OC)=CC(OC)=C1OC</chem>                                                                                                                              |                   |      |    |       |
| <b>Oxalolaudonium</b> | C48H62N2O10     | <chem>COC1=C(OC)C=C(C[N+](C)(CCCOC(C(OCCC[N+])2(C)C(CC3=CC=C(OC)C(OC)=C3)C(C=CC=C4)=C4CC2)=O)=O)C(CC5=CC=C(O)C)C(OC)=C5)C6)C6=C1</chem>                                        | 10.1002/med.20036 | 826  | +2 | 2.329 |
| <b>d-Tubocurarine</b> | C37H42N2O6      | <chem>OC1=C(OC2=CC=C3C=C2)C([C@@]([N+](C)(C)CC4)([H])CC5=C=C(O)C(OC(C(OC)=C6)=CC7=C6CC[N+](C)([H])[C@@]7([H])C3)=C5)=C4C=C1OC</chem>                                           | 10.1021/jm020574+ | 610  | +2 | 4.412 |
| <b>Metocurine</b>     | C39H46N2O6      | <chem>C[N+]1(C)[C@@](CC2=CC=C(O)C(OC(C(OC)=C3)=CC4=C3CC[N+](C)(C)[C@@]4([H])C5)=C2)([H])C6=C(CC1)C=C(OC)C(OC)=C6OC7=CC=C5C=C7</chem>                                           | 10.1021/jm020574+ | 638  | +2 | 0.53  |
| <b>Boros2003-20a</b>  | C54H71ClN2O14   | <chem>C[N+](CCC1=C2C=C(OC)C(OC)=C1)(CCCOC(/C(Cl)=C/C(OCCC[N+])3(C)C(CC4=CC(OC)=C(OC)C(OC)=C4)C(C=C(OC)C(OC)=C5)=C5CC3)=O)=O)C2CC6=CC(OC)=C(OC)C(OC)=C6</chem>                  | 10.1021/jm020574+ | 1006 | +2 | 2.600 |
| <b>Boros2003-20b</b>  | C52H63ClN2O14   | <chem>C[N+](CCC1=C2C=C(OCO3)C3=C1)(CCCOC(/C(Cl)=C/C(OCCC[N+])4(C)C(CC5=CC(OC)=C(OC)C(OC)=C5)C(C=C(OCO6)C6=C7)=C7CC4)=O)=O)C2CC8=CC(OC)=C(OC)C(OC)=C8</chem>                    | 10.1021/jm020574+ | 974  | +2 | 3.214 |
| <b>Boros2003-20c</b>  | C52H67ClN2O14   | <chem>C[N+]1(CCCOC(/C(Cl)=C/C(OCCC[N+])2(C)C(C3=CC(OC)=C(OC)C(OC)=C3)C(C=C(OC)C(OC)=C4)=C4CC2)=O)=O)C(C5=CC(OC)=C(OC)C(OC)=C5)C6=C(C=C(OC)C(OC)=C6)CC1</chem>                  | 10.1021/jm020574+ | 978  | +2 | 1.842 |
| <b>Boros2003-21</b>   | C52H68N2O14     | <chem>C[N+]1(CCCOC(/C=C/C(OCCC[N+])2(C)C(C3=CC(OC)=C(OC)C(OC)=C3)C(C=C(OC)C(OC)=C4)=C4CC2)=O)=O)C(C5=CC(OC)=C(OC)C(OC)=C5)C6=C(C=C(OC)C(OC)=C6)CC1</chem>                      | 10.1021/jm020574+ | 944  | +2 | 1.189 |
| <b>Boros2003-24g</b>  | C54H71ClN2O15   | <chem>COC1=C(OC)C([C@@H](CC2=CC(OC)=C(OC)C(OC)=C2)[N@@+](CCCOC(/C(Cl)=C/C(OCCC[N@@+])3(C)[C@@H](C4=CC(OC)=C(OC)C(OC)=C4)C(C=C(OC)C(OC)=C5)=C5CC3)=O)=O)(C)CC6)=C6C=C1OC</chem> | 10.1021/jm020574+ | 1022 | +2 | 1.863 |
| <b>Boros2003-24i</b>  | C52H67ClN2O14   | <chem>COC1=CC([C@@H](CC2=CC(OC)=C(OC)C(OC)=C2)[N@@+](CCCOC(/C(Cl)=C/C(OCCC[N+])3([H])[C@@H](C4=CC(OC)=C(OC)C(OC)=C4)C(C=C(OC)C(OC)=C5)=C5CC3)=O)=O)(C)CC6)=C6C=C1OC</chem>     | 10.1021/jm020574+ | 978  | +2 | 5.794 |
| <b>Boros2003-24j</b>  | C51H65ClN2O12   | <chem>COC1=CC([C@@H](CC2=CC(OC)=C(OC)C(OC)=C2)[N@@+](CCCOC(/C(Cl)=C/C(OCCC[N@@+])3(C)[C@@H](C4=CC=C(OC)C=C4)C(C=C(OC)C(OC)=C5)=C5CC3)=O)=O)(C)CC6)=C6C=C1OC</chem>             | 10.1021/jm020574+ | 932  | +2 | 2.840 |
| <b>Boros2003-24k</b>  | C50H61ClF2N2O11 | <chem>COC1=CC([C@@H](CC2=CC(OC)=C(OC)C(OC)=C2)[N@@+](CCCOC(/C(Cl)=C/C(OCCC[N@@+])3(C)[C@@H](C4=CC=C(F)C(F)=C4)C(C=C(OC)C(OC)=C5)=C5CC3)=O)=O)(C)CC6)=C6C=C1OC</chem>           | 10.1021/jm020574+ | 938  | +2 | 3.137 |
| <b>Boros2003-24l</b>  | C53H67ClN2O13   | <chem>C[N+](CCC1=C2C=C(OC)C(OC)=C1)(CCCOC(/C(Cl)=C/C(OCCC[N+])34(C(C5=CC(OC)=C(OC)C=C5CC4)C(C=C(OC)C(OC)=C6)=C6CC3)=O)=O)C2CC7=CC(OC)=C(OC)C(OC)=C7</chem>                     | 10.1021/jm020574+ | 974  | +2 | 2.444 |
| <b>Boros2003-24m</b>  | C53H67ClN2O13   | <chem>C[N+](CCC1=C2C=C(OC)C(OC)=C1)(CCCOC(/C=C(Cl)/C(OCCC[N+])34(C(C5=CC(OC)=C(OC)C=C5CC4)C(C=C(OC)C(OC)=C6)=C6CC3)=O)=O)C2CC7=CC(OC)=C(OC)C(OC)=C7</chem>                     | 10.1021/jm020574+ | 974  | +2 | 2.444 |

|                      |               |                                                                                                                                                                     |                           |      |    |        |
|----------------------|---------------|---------------------------------------------------------------------------------------------------------------------------------------------------------------------|---------------------------|------|----|--------|
| <b>Boros2003-24n</b> | C54H69CIN2O15 | <chem>O=C(/C(Cl)=C/C(OCCCN[+])1(C)C(C2=CC(OC)=C(OC)C(OC)=C2)C(C=C(OC)C(OC)=C3)=C3CC1)=O)OCCCN[+])4(CCC5=C6C(OC)=C(OC)C(OC)=C5)C6CC7=C(C4)C(OC)=C(OC)C(OC)=C7</chem> | 10.1021/jm020574+         | 1020 | +2 | 1.519  |
| <b>Boros2003-25a</b> | C57H80N2O14   | <chem>C[N+](CCC1=C2C=C(OC)C(OC)=C1)(CCCOC(CCCCCC(OCCC[N+])3(C)[C@H](C4=CC(OC)=C(OC)C(OC)=C4)C(C=C(OC)C(OC)=C5)=C5CC3)=O)=O)C2CC6=CC(OC)=C(OC)C(OC)=C6</chem>        | 10.1021/jm020574+         | 1016 | +2 | 2.741  |
| <b>Boros2003-25b</b> | C55H76N2O14   | <chem>C[N+](CCC1=C2C=C(OC)C(OC)=C1)(CCCOC(CCCCC(OCCC[N+])3(C)[C@@H](C4=CC(OC)=C(OC)C(OC)=C4)C(C=C(OC)C(OC)=C5)=C5CC3)=O)=O)C2CC6=CC(OC)=C(OC)C(OC)=C6</chem>        | 10.1021/jm020574+         | 988  | +2 | 1.683  |
| <b>Boros2003-25c</b> | C56H78N2O14   | <chem>C[N+](CCC1=C2C=C(OC)C(OC)=C1)(CCCOC(CCCCC(OCCC[N+])3(C)[C@@H](C4=CC(OC)=C(OC)C(OC)=C4)C(C=C(OC)C(OC)=C5)=C5CC3)=O)=O)C2CC6=CC(OC)=C(OC)C(OC)=C6</chem>        | 10.1021/jm020574+         | 1002 | +2 | 2.212  |
| <b>Boros2003-25e</b> | C58H82N2O14   | <chem>C[N+](CCC1=C2C=C(OC)C(OC)=C1)(CCCOC(CCCCCC(OCC[N+])3(C)[C@@H](C4=CC(OC)=C(OC)C(OC)=C4)C(C=C(OC)C(OC)=C5)=C5CC3)=O)=O)C2CC6=CC(OC)=C(OC)C(OC)=C6</chem>        | 10.1021/jm020574+         | 1030 | +2 | 3.270  |
| <b>Boros2003-25f</b> | C59H84N2O14   | <chem>C[N+](CCC1=C2C=C(OC)C(OC)=C1)(CCCOC(CCCCCC(OC[N+])3(C)[C@@H](C4=CC(OC)=C(OC)C(OC)=C4)C(C=C(OC)C(OC)=C5)=C5CC3)=O)=O)C2CC6=CC(OC)=C(OC)C(OC)=C6</chem>         | 10.1021/jm020574+         | 1044 | +2 | 3.799  |
| <b>Boros2003-27a</b> | C53H71FN2O14  | <chem>C[N+](CCC1=C2C=C(OC)C(OC)=C1)(CCCOC([C@@H](F)CC(OC[N+])3(C)[C@@H](C4=CC(OC)=C(OC)C(OC)=C4)C(C=C(OC)C(OC)=C5)=C5CC3)=O)=O)C2CC6=CC(OC)=C(OC)C(OC)=C6</chem>    | 10.1021/jm020574+         | 978  | +2 | 1.502  |
| <b>Boros2003-27b</b> | C54H72F2N2O14 | <chem>C[N+](CCC1=C2C=C(OC)C(OC)=C1)(CCCOC(C(F)(CCC(OCCCN[+])3(C)[C@@H](C4=CC(OC)=C(OC)C(OC)=C4)C(C=C(OC)C(OC)=C5)=C5CC3)=O)F)=O)C2CC6=CC(OC)=C(OC)C(OC)=C6</chem>   | 10.1021/jm020574+         | 1010 | +2 | 2.030  |
| <b>Boros2003-27c</b> | C53H70F2N2O14 | <chem>C[N+](CCC1=C2C=C(OC)C(OC)=C1)(CCCOC(C(C(OCCCN[+])3(C)[C@@H](C4=CC(OC)=C(OC)C(OC)=C4)C(C=C(OC)C(OC)=C5)=C5CC3)=O)(F)F)=O)C2CC6=CC(OC)=C(OC)C(OC)=C6</chem>     | 10.1021/jm020574+         | 996  | +2 | 2.575  |
| <b>Boros2003-27d</b> | C54H72F2N2O15 | <chem>C[N+](CCC1=C2C(OC)=C(OC)C(OC)=C1)(CCCOC(C(C(OCCC[N+])3(C)[C@@H](C4=CC(OC)=C(OC)C(OC)=C4)C(C=C(OC)C(OC)=C5)=C5CC3)=O)(F)F)=O)C2CC6=CC(OC)=C(OC)C(OC)=C6</chem> | 10.1021/jm020574+         | 1026 | +2 | 2.217  |
| <b>Boros2003-27f</b> | C53H70F2N2O14 | <chem>C[N+](CCC1=C2C=C(OC)C(OC)=C1)(CCCOC(C(C(F)(C(OCCC[N+])3(C)[C@@H](C4=CC(OC)=C(OC)C(OC)=C4)C(C=C(OC)C(OC)=C5)=C5CC3)=O)=O)C2CC6=CC(OC)=C(OC)C(OC)=C6</chem>     | 10.1021/jm020574+         | 996  | +2 | 2.575  |
| <b>Boros2003-28a</b> | C53H69FN2O14  | <chem>C[N+](CCC1=C2C=C(OC)C(OC)=C1)(CCCOC(/C(F)=C/C(OCCC[N+])3(C)[C@@H](C4=CC(OC)=C(OC)C(OC)=C4)C(C=C(OC)C(OC)=C5)=C5CC3)=O)=O)C2CC6=CC(OC)=C(OC)C(OC)=C6</chem>    | 10.1021/jm020574+         | 976  | +2 | 1.621  |
| <b>Boros2003-28b</b> | C54H71FN2O15  | <chem>C[N+](CCC1=C2C(OC)=C(OC)C(OC)=C1)(CCCOC(/C(F)=C/C(OC[N+])3(C)[C@@H](C4=CC(OC)=C(OC)C(OC)=C4)C(C=C(OC)C(OC)=C5)=C5CC3)=O)=O)C2CC6=CC(OC)=C(OC)C(OC)=C6</chem>  | 10.1021/jm020574+         | 1006 | +2 | 1.263  |
| <b>Gyermek2006-1</b> | C43H56N2O12   | <chem>C[N@@+])1(CC2=CC(OC(C)=O)=C(OC(C)=O)C=C2)[C@H]3CCC[C@@H]1C[C@@H](OC(CC(O[C@H]4C[C@H]5CCC[C@@H](C4)[N@@+])5(CC6=CC=C(OC(C)=O)C(OC(C)=O)=C6)C)=O)=O)C3</chem>   | 10.1016/j.lfs.2006.01.038 | 792  | +2 | -4.445 |

|                |               |                                                                                                                                                                 |                           |     |    |        |
|----------------|---------------|-----------------------------------------------------------------------------------------------------------------------------------------------------------------|---------------------------|-----|----|--------|
| Gyermek2006-2  | C44H58N2O12   | C[N@@+](CC2=CC(OC(C)=O)=C(OC(C)=O)C=C2)[C@H]3CCC[C@@H]1C[C@@H](OC(CCC(O[C@H]4C[C@H]5CCC[C@@H](C4)[N@@+](CC6=CC=C(OC(C)=O)C(OC(C)=O)=C6)C)=O)C3                  | 10.1016/j.lfs.2006.01.038 | 806 | +2 | -4.09  |
| Gyermek2006-3  | C45H60N2O12   | C[N@@+](CC2=CC(OC(C)=O)=C(OC(C)=O)C=C2)[C@H]3CCC[C@@H]1C[C@@H](OC(CCCC(O[C@H]4C[C@H]5CCC[C@@H](C4)[N@@+](CC6=CC=C(OC(C)=O)C(OC(C)=O)=C6)C)=O)C3                 | 10.1016/j.lfs.2006.01.038 | 820 | +2 | -3.735 |
| Gyermek2006-4  | C46H62N2O12   | C[N@@+](CC2=CC(OC(C)=O)=C(OC(C)=O)C=C2)[C@H]3CCC[C@@H]1C[C@@H](OC(CCCCC(O[C@H]4C[C@H]5CCC[C@@H](C4)[N@@+](CC6=CC=C(OC(C)=O)C(OC(C)=O)=C6)C)=O)C3                | 10.1016/j.lfs.2006.01.038 | 834 | +2 | -3.786 |
| Gyermek2006-5  | C47H64N2O12   | C[N@@+](CC2=CC(OC(C)=O)=C(OC(C)=O)C=C2)[C@H]3CCC[C@@H]1C[C@@H](OC(CCCCC(O[C@H]4C[C@H]5CCC[C@@H](C4)[N@@+](CC6=CC=C(OC(C)=O)C(OC(C)=O)=C6)C)=O)C3                | 10.1016/j.lfs.2006.01.038 | 848 | +2 | -3.257 |
| Gyermek2006-6  | C48H66N2O12   | C[N@@+](CC2=CC(OC(C)=O)=C(OC(C)=O)C=C2)[C@H]3CCC[C@@H]1C[C@@H](OC(CCCCC(O[C@H]4C[C@H]5CCC[C@@H](C4)[N@@+](CC6=CC=C(OC(C)=O)C(OC(C)=O)=C6)C)=O)C3                | 10.1016/j.lfs.2006.01.038 | 862 | +2 | -2.728 |
| Gyermek2006-7  | C44H56N2O12   | C[N@@+](CC2=CC(OC(C)=O)=C(OC(C)=O)C=C2)[C@H]3CCC[C@@H]1C[C@@H](OC(/C=C/C(O[C@H]4C[C@H]5CCC[C@@H](C4)[N@@+](CC6=CC=C(OC(C)=O)C(OC(C)=O)=C6)C)=O)C3               | 10.1016/j.lfs.2006.01.038 | 804 | +2 | -3.73  |
| Gyermek2006-8  | C44H55CIN2O12 | C[N@@+](CC2=CC(OC(C)=O)=C(OC(C)=O)C=C2)[C@H]3CCC[C@@H]1C[C@@H](OC(/C(CI)=C/C(O[C@H]4C[C@H]5CCC[C@@H](C4)[N@@+](CC6=CC=C(OC(C)=O)C(OC(C)=O)=C6)C)=O)C3           | 10.1016/j.lfs.2006.01.038 | 838 | +2 | -3.08  |
| Gyermek2006-9  | C48H64N2O12   | C[N@@+](CC2=CC(OC(C)=O)=C(OC(C)=O)C=C2)[C@H]3CCC[C@@H]1C[C@@H](OC(CC/C=C/CCC(O[C@H]4C[C@H]5CCC[C@@H](C4)[N@@+](CC6=CC=C(OC(C)=O)C(OC(C)=O)=C6)C)=O)C3           | 10.1016/j.lfs.2006.01.038 | 860 | +2 | -3.212 |
| Gyermek2006-10 | C44H58N2O12S  | C[N@@+](CC2=CC(OC(C)=O)=C(OC(C)=O)C=C2)[C@H]3CCC[C@@H]1C[C@@H](OC(CSCC(O[C@H]4C[C@H]5CCC[C@@H](C4)[N@@+](CC6=CC=C(OC(C)=O)C(OC(C)=O)=C6)C)=O)C3                 | 10.1016/j.lfs.2006.01.038 | 838 | +2 | -4.32  |
| Gyermek2006-11 | C46H60N2O12   | C[N@@+](CC2=CC(OC(C)=O)=C(OC(C)=O)C=C2)[C@H]3CCC[C@@H]1C[C@@H](OC([C@@H]4[C@@H](CC4)C(O[C@H]5C[C@H]6CCC[C@@H](C5)[N@@+](CC7=CC=C(OC(C)=O)C(OC(C)=O)=C7)C)=O)C3  | 10.1016/j.lfs.2006.01.038 | 832 | +2 | -3.806 |
| Gyermek2006-12 | C47H62N2O12   | C[N@@+](CC2=CC(OC(C)=O)=C(OC(C)=O)C=C2)[C@H]3CCC[C@@H]1C[C@@H](OC([C@@H]4[C@@H](CCC4)C(O[C@H]5C[C@H]6CCC[C@@H](C5)[N@@+](CC7=CC=C(OC(C)=O)C(OC(C)=O)=C7)C)=O)C3 | 10.1016/j.lfs.2006.01.038 | 846 | +2 | -3.247 |

|                |               |                                                                                                                                                                         |                         |     |    |        |    |
|----------------|---------------|-------------------------------------------------------------------------------------------------------------------------------------------------------------------------|-------------------------|-----|----|--------|----|
|                |               | C)=O)=C7)C)=O)=O)C3                                                                                                                                                     |                         |     |    |        |    |
| Gyermek2006-13 | C48H64N2O12   | C[N@@+](CC2=CC(OC(C)=O)=C(OC(C)=O)C=C2)[C@H]3CCC[C@@H]1C[C@@H](OC([C@@H]4[C@@H](CCCC4)C(O[C@H]5C[C@H]6CCC[C@@H](C5)[N@@+](CC7=CC=C(OC(C)=O)C(O)C(C)=O)=C7)C)=O)=O)C3    | 10.1016/j.lfs.2006.01.0 | 860 | +2 | -2.688 | 38 |
| Gyermek2006-14 | C49H62N2O12   | C[N@@+](CC2=CC(OC(C)=O)=C(OC(C)=O)C=C2)[C@H]3CCC[C@@H]1C[C@@H](OC(C4=C(C5CC[C@H]4C5)C(O[C@H]6C[C@H]7CCC[C@@H](C6)[N@@+](CC8=CC=C(OC(C)=O)C(OC(C)=O)=C8)C)=O)=O)C3       | 10.1016/j.lfs.2006.01.0 | 870 | +2 | -2.053 | 38 |
| Gyermek2006-15 | C48H66N2O12   | C[N@@+](CC2=CC(OC(CC)=O)=C(OC(CC)=O)C=C2)[C@H]3CCC[C@@H]1C[C@@H](OC(CCC(O[C@H]4C[C@H]5CCC[C@@H](C4)[N@@+](CC6=CC=C(OC(CC)=O)C(OC(CC)=O)=C6)C)=O)=O)C3                   | 10.1016/j.lfs.2006.01.0 | 862 | +2 | -1.974 | 38 |
| Gyermek2006-16 | C49H68N2O12   | C[N@@+](CC2=CC(OC(CC)=O)=C(OC(CC)=O)C=C2)[C@H]3CCC[C@@H]1C[C@@H](OC(CCCC(O[C@H]4C[C@H]5CCC[C@@H](C4)[N@@+](CC6=CC=C(OC(CC)=O)C(OC(CC)=O)=C6)C)=O)=O)C3                  | 10.1016/j.lfs.2006.01.0 | 876 | +2 | -1.619 | 38 |
| Gyermek2006-17 | C52H74N2O12   | C[N@@+](CC2=CC(OC(CC)=O)=C(OC(CC)=O)C=C2)[C@H]3CCC[C@@H]1C[C@@H](OC(CCCCCC(O[C@H]4C[C@H]5CCC[C@@H](C4)[N@@+](CC6=CC=C(OC(CC)=O)C(OC(CC)=O)=C6)C)=O)=O)C3                | 10.1016/j.lfs.2006.01.0 | 918 | +2 | -0.612 | 38 |
| Gyermek2006-18 | C48H64N2O12   | C[N@@+](CC2=CC(OC(CC)=O)=C(OC(CC)=O)C=C2)[C@H]3CCC[C@@H]1C[C@@H](OC(/C=C/C(O[C@H]4C[C@H]5CCC[C@@H](C4)[N@@+](CC6=CC=C(OC(CC)=O)C(OC(CC)=O)=C6)C)=O)=O)C3                | 10.1016/j.lfs.2006.01.0 | 860 | +2 | -1.614 | 38 |
| Gyermek2006-19 | C48H63ClN2O12 | C[N@@+](CC2=CC(OC(CC)=O)=C(OC(CC)=O)C=C2)[C@H]3CCC[C@@H]1C[C@@H](OC(/C(Cl)=C/C(O[C@H]4C[C@H]5CCC[C@@H](C4)[N@@+](CC6=CC=C(OC(CC)=O)C(OC(CC)=O)=C6)C)=O)=O)C3            | 10.1016/j.lfs.2006.01.0 | 894 | +2 | -0.961 | 38 |
| Gyermek2006-20 | C51H70N2O12   | C[N@@+](CC2=CC(OC(CC)=O)=C(OC(CC)=O)C=C2)[C@H]3CCC[C@@H]1C[C@@H](OC([C@@H](CCC4)C4C(O[C@H]5C[C@H]6CCC[C@@H](C5)[N@@+](CC7=CC=C(OC(CC)=O)C(OC(CC)=O)=C7)C)=O)=O)C3       | 10.1016/j.lfs.2006.01.0 | 902 | +2 | -1.131 | 38 |
| Gyermek2006-21 | C52H72N2O12   | C[N@@+](CC2=CC(OC(CC)=O)=C(OC(CC)=O)C=C2)[C@H]3CCC[C@@H]1C[C@@H](OC([C@@H](CCCC4)[C@@H]4C(O[C@H]5C[C@H]6CCC[C@@H](C5)[N@@+](CC7=CC=C(OC(CC)=O)C(OC(CC)=O)=C7)C)=O)=O)C3 | 10.1016/j.lfs.2006.01.0 | 916 | +2 | -0.572 | 38 |
| Gyermek2006-22 | C41H56N2O10   | C[N@@+](CC2=CC(OC)=C(OC(C)=O)C=C2)[C@H]3CCC[C@@H]1C[C@@H](OC(CC(O[C@H]4C[C@H]5CCC[C@@H](C4)[N@@+](CC6=CC=C(OC(C)=O)C(OC)=C6)C)=O)=O)C3                                  | 10.1016/j.lfs.2006.01.0 | 736 | +2 | -3.305 | 38 |
| Gyermek2006-23 | C43H60N2O10   | C[N@@+](CC2=CC(OC)=C(OC(C)=O)C=C2)[C@H]3CCC[C@@H]1C[C@@H](OC(CCCC(O[C@H]4C[C@H]5CCC[C@@H](C4)[N@@+](CC6=CC=C(OC(C)=O)C(OC)=C6)C)=O)=O)C3                                | 10.1016/j.lfs.2006.01.0 | 764 | +2 | -2.595 | 38 |

|                |               |                                                                                                                                                                |                         |     |    |        |
|----------------|---------------|----------------------------------------------------------------------------------------------------------------------------------------------------------------|-------------------------|-----|----|--------|
|                |               | @+][5(CC6=CC=C(OC(C)=O)C(OC)=C6C)=O)C3                                                                                                                         |                         |     |    |        |
| Gyermek2006-24 | C45H64N2O10   | C[N@+][1](CC2=CC(OC)=C(OC(C)=O)C=C2)[C@H]3CCC[C@@H]1C[C@@H](OC(CCCCC(O[C@H]4C[C@H]5CCC[C@@H](C4)[N@+][5(CC6=CC=C(OC(C)=O)C(OC)=C6C)=O)C3                       | 10.1016/j.lfs.2006.01.0 | 792 | +2 | -2.117 |
| Gyermek2006-25 | C46H66N2O10   | C[N@+][1](CC2=CC(OC)=C(OC(C)=O)C=C2)[C@H]3CCC[C@@H]1C[C@@H](OC(CCCCC(O[C@H]4C[C@H]5CCC[C@@H](C4)[N@+][5(CC6=CC=C(OC(C)=O)C(OC)=C6C)=O)C3                       | 10.1016/j.lfs.2006.01.0 | 806 | +2 | -1.588 |
| Gyermek2006-26 | C42H56N2O10   | C[N@+][1](CC2=CC(OC)=C(OC(C)=O)C=C2)[C@H]3CCC[C@@H]1C[C@@H](OC(/C=C/C(O[C@H]4C[C@H]5CCC[C@@H](C4)[N@+][5(CC6=CC=C(OC(C)=O)C(OC)=C6C)=O)C3                      | 10.1016/j.lfs.2006.01.0 | 748 | +2 | -2.590 |
| Gyermek2006-27 | C42H55CIN2O10 | C[N@+][1](CC2=CC(OC)=C(OC(C)=O)C=C2)[C@H]3CCC[C@@H]1C[C@@H](OC(/C(Cl)=C/C(O[C@H]4C[C@H]5CCC[C@@H](C4)[N@+][5(CC6=CC=C(OC(C)=O)C(OC)=C6C)=O)C3                  | 10.1016/j.lfs.2006.01.0 | 782 | +2 | -1.937 |
| Gyermek2006-28 | C42H58N2O10S  | C[N@+][1](CC2=CC(OC)=C(OC(C)=O)C=C2)[C@H]3CCC[C@@H]1C[C@@H](OC(CSCC(O[C@H]4C[C@H]5CCC[C@@H](C4)[N@+][5(CC6=CC=C(OC(C)=O)C(OC)=C6C)=O)C3                        | 10.1016/j.lfs.2006.01.0 | 782 | +2 | -3.180 |
| Gyermek2006-29 | C46H64N2O10   | C[N@+][1](CC2=CC(OC)=C(OC(C)=O)C=C2)[C@H]3CCC[C@@H]1C[C@@H](OC(C(CCCC4)[C@@H]4C(O[C@H]5C[C@H]6CC[C@@H](C5)[N@+][6(CC7=CC=C(OC(C)=O)C(OC)=C7C)=O)=O)C3          | 10.1016/j.lfs.2006.01.0 | 804 | +2 | -1.548 |
| Gyermek2006-30 | C47H62N2O10   | C[N@+][1](CC2=CC(OC)=C(OC(C)=O)C=C2)[C@H]3CCC[C@@H]1C[C@@H](OC(C([C@H]4CC[C@H]5C4)=C5C(O[C@H]6C[C@H]7CCC[C@@H](C6)[N@+][7(CC8=CC=C(OC(C)=O)C(OC)=C8C)=O)C3     | 10.1016/j.lfs.2006.01.0 | 814 | +2 | -0.913 |
| Gyermek2006-31 | C41H54Cl2N2O8 | C[N@+][1](CC2=CC(Cl)=C(OC(C)=O)C=C2)[C@H]3CCC[C@@H]1C[C@@H](OC(CCCC(O[C@H]4C[C@H]5CCC[C@@H](C4)[N@+][5(CC6=CC=C(OC(C)=O)C(Cl)=C6C)=O)C3                        | 10.1016/j.lfs.2006.01.0 | 772 | +2 | -0.827 |
| Gyermek2006-32 | C42H56Cl2N2O8 | C[N@+][1](CC2=CC(Cl)=C(OC(C)=O)C=C2)[C@H]3CCC[C@@H]1C[C@@H](OC(CCCC(O[C@H]4C[C@H]5CCC[C@@H](C4)[N@+][5(CC6=CC=C(OC(C)=O)C(Cl)=C6C)=O)C3                        | 10.1016/j.lfs.2006.01.0 | 786 | +2 | -0.878 |
| Gyermek2006-33 | C41H54N4O12   | C[N@+][1](CC2=CC([N+](O-))=O)C(OC(C)=O)C=C2)[C@H]3CCC[C@@H]1C[C@@H](OC(CCCC(O[C@H]4C[C@H]5CCC[C@@H](C4)[N@+][5(CC6=CC=C(OC(C)=O)C([N+](O-))=O)C6C)=O)C3        | 10.1016/j.lfs.2006.01.0 | 794 | +2 | -2.547 |
| Gyermek2006-34 | C45H62N2O8    | C[N@+][1](CC2=C(OC)C=CC(OC)=C2)[C@H]3CCC[C@@H]1C[C@@H](OC(C([C@H]4CC[C@H]5C4)=C5C(O[C@H]6C[C@H]7CC[C@@H](C6)[N@+][7(CC8=CC(OC)=CC=C8OC)C)=O)C3                 | 10.1016/j.lfs.2006.01.0 | 758 | +2 | 0.927  |
| Gyermek2006-35 | C43H56N4O10   | C[N@+][1](CC2=C(OC)C=CC([N+](O-))=O)C2)[C@H]3CCC[C@@H]1C[C@@H](OC(C([C@H]4CC[C@H]5C4)=C5C(O[C@H]6C[C@H]7CCC[C@@H](C6)[N@+][7(CC8=CC([N+](O-))=O)C=C8OC)C)=O)C3 | 10.1016/j.lfs.2006.01.0 | 788 | +2 | 0.835  |
| Gyermek2006-36 | C45H64N2O12   | C[N@+][1](CC2=CC(OC)=C(OC(C)=O)C(OC)=C2)[C@H]3CCC[C@@H]1C[C@@H](OC(C(CCCC(O[C@H]4C[C@H]5CCC[C@@H](C4)[N@+][5(CC6=CC=C(OC(C)=O)C(OC)=C6C)=O)C3                  | 10.1016/j.lfs.2006.01.0 | 824 | +2 | -3.311 |

|                |              |                                                                                                                                                                                       |                         |     |    |        |  |
|----------------|--------------|---------------------------------------------------------------------------------------------------------------------------------------------------------------------------------------|-------------------------|-----|----|--------|--|
|                |              | @@H]1C[C@@H](OC(CCCC(O[C@H]4C[C@H]5CCC[C@@H](C<br>4)[N@@+]5(CC6=CC(OC)=C(OC(C)=O)C(OC)=C6C)=O)=O)C3                                                                                   | 38                      |     |    |        |  |
| Gyermek2006-37 | C47H68N2O12  | C[N@@+]1(CC2=CC(OC)=C(OC(C)=O)C(OC)=C2)[C@H]3CCC[C<br>@@H]1C[C@@H](OC(CCCCC(O[C@H]4C[C@H]5CCC[C@@H<br>(C4)[N@@+]5(CC6=CC(OC)=C(OC(C)=O)C(OC)=C6C)=O)=O)C<br>3                         | 10.1016/j.lfs.2006.01.0 | 852 | +2 | -2.833 |  |
| Gyermek2006-38 | C48H70N2O12  | C[N@@+]1(CC2=CC(OC)=C(OC(C)=O)C(OC)=C2)[C@H]3CCC[C<br>@@H]1C[C@@H](OC(CCCCC(O[C@H]4C[C@H]5CCC[C@@<br>H](C4)[N@@+]5(CC6=CC(OC)=C(OC(C)=O)C(OC)=C6C)=O)=O)<br>C3                        | 10.1016/j.lfs.2006.01.0 | 866 | +2 | -2.304 |  |
| Gyermek2006-39 | C44H62N2O12S | C[N@@+]1(CC2=CC(OC)=C(OC(C)=O)C(OC)=C2)[C@H]3CCC[C<br>@@H]1C[C@@H](OC(CSCC(O[C@H]4C[C@H]5CCC[C@@H](C<br>4)[N@@+]5(CC6=CC(OC)=C(OC(C)=O)C(OC)=C6C)=O)=O)C3                             | 10.1016/j.lfs.2006.01.0 | 842 | +2 | -3.896 |  |
| Gyermek2006-40 | C44H60N2O12  | C[N@@+]1(CC2=CC(OC)=C(OC(C)=O)C(OC)=C2)[C@H]3CCC[C<br>@@H]1C[C@@H](OC(/C=C/C(O[C@H]4C[C@H]5CCC[C@@H](<br>C4)[N@@+]5(CC6=CC(OC)=C(OC(C)=O)C(OC)=C6C)=O)=O)C3                           | 10.1016/j.lfs.2006.01.0 | 808 | +2 | -3.306 |  |
| Gyermek2006-41 | C48H68N2O12  | C[N@@+]1(CC2=CC(OC)=C(OC(C)=O)C(OC)=C2)[C@H]3CCC[C<br>@@H]1C[C@@H](OC(C(CCCC4)[C@@H]4C(O[C@H]5C[C@H]6<br>CCC[C@@H](C5)[N@@+]6(CC7=CC(OC)=C(OC(C)=O)C(OC)=C<br>7C)=O)=O)C3             | 10.1016/j.lfs.2006.01.0 | 864 | +2 | -2.264 |  |
| Gyermek2006-42 | C49H66N2O12  | C[N@@+]1(CC2=CC(OC)=C(OC(C)=O)C(OC)=C2)[C@H]3CCC[C<br>@@H]1C[C@@H](OC(C(C4CCC5C4)=C5C(O[C@H]6C[C@H]7C<br>CC[C@@H](C6)[N@@+]7(CC8=CC(OC)=C(OC(C)=O)C(OC)=C8)<br>C)=O)=O)C3             | 10.1016/j.lfs.2006.01.0 | 874 | +2 | -1.629 |  |
| Gyermek2006-43 | C47H68N2O12  | C[N@@+]1(CC2=CC(OC)=C(OC(CC)=O)C(OC)=C2)[C@H]3CCC[<br>C@@H]1C[C@@H](OC(CCCC(O[C@H]4C[C@H]5CCC[C@@H](<br>C4)[N@@+]5(CC6=CC(OC)=C(OC(CC)=O)C(OC)=C6C)=O)=O)C<br>3                       | 10.1016/j.lfs.2006.01.0 | 852 | +2 | -2.253 |  |
| Gyermek2006-44 | C49H64N2O16  | C[N@@+]1(CC2=CC(OC(C)=O)=C(OC(C)=O)C(OC(C)=O)=C2)[C<br>@H]3CCC[C@@H]1C[C@@H](OC(CCCC(O[C@H]4C[C@H]5CC<br>C[C@@H](C4)[N@@+]5(CC6=CC(OC(C)=O)=C(OC(C)=O)C(OC(<br>C)=O)=C6C)=O)=O)C3     | 10.1016/j.lfs.2006.01.0 | 936 | +2 | -5.591 |  |
| Gyermek2006-45 | C49H62N2O16  | C[N@@+]1(CC2=CC(OC(C)=O)=C(OC(C)=O)C(OC(C)=O)=C2)[C<br>@H]3CCC[C@@H]1C[C@@H](OC(/C=C/C(C(O[C@H]4C[C@H]5<br>CCC[C@@H](C4)[N@@+]5(CC6=CC(OC(C)=O)=C(OC(C)=O)C(<br>OC(C)=O)=C6C)=O)=O)C3 | 10.1016/j.lfs.2006.01.0 | 934 | +2 | -5.619 |  |
| Booij2000-9c   | C14H30N4O2   | C[N+](C)(C)CC(NCC(NCC[N+])1(CCCC1C)=O)=O                                                                                                                                              | 10.1021/jm0010062       | 286 | +2 | -7.494 |  |
| Booij2000-11c  | C35H45N7O7   | O=C(NCC(NCC(NCC[N+](CC1=CC=CC=C1)(CC2=CC=C([N+](O<br>-))=O)C=C2)C)=O)C[N+](CC4=CC=C([N+](O-))=O)C=C4)C<br>CCCC3                                                                       | 10.1021/jm0010062       | 675 | +2 | -1.234 |  |
| Booij2000-15a  | C27H40N4O2   | C[N+](CC1=CC=CC=C1)(CC2=CC=CC=C2)CC(NCC(NCC[N+])3(C<br>)CCCC3)=O)=O                                                                                                                   | 10.1021/jm0010062       | 452 | +2 | -2.749 |  |



|                |               |                                                                                                                                                                        |                   |     |    |        |
|----------------|---------------|------------------------------------------------------------------------------------------------------------------------------------------------------------------------|-------------------|-----|----|--------|
| Booij2000-15c  | C36H46N6O7    | <chem>O=C(NC(CC1=CC=CC=C1)C(NCC[N+](CC3=CC=C([N+])([O-])=O)C=C3)CCOCC2)=O)C[N+](CC5=CC=C([N+])([O-])=O)C=C5)CCCC4</chem>                                               | 10.1021/jm0010062 | 674 | +2 | 1.416  |
| Booij2000-20a  | C26H45N5O3    | <chem>C[N+](CC(N(C)CC(N(CC(N(CC[N+](C)(CC2=CC=CC=C2)C)C)=O)C)=O)O)CCCCC1</chem>                                                                                        | 10.1021/jm0010062 | 475 | +2 | -3.486 |
| Booij2000-20c  | C38H51N7O7    | <chem>O=C(N(C)CC(N(CC(N(C)CC[N+](CC1=CC=C([N+])([O-])=O)C=C1)(C)CC2=CC=CC=C2)=O)C)=O)C[N+](CC4=CC=C([N+])([O-])=O)C=C4)CCCCC3</chem>                                   | 10.1021/jm0010062 | 717 | +2 | 0.334  |
| Booij2000-20e  | C38H49N7O7    | <chem>O=C(N(C)CC(N(CC(N1CC[N+](CC2=CC=CC=C2)(CC3=CC=C([N+])([O-])=O)C=C3)CC1)=O)C)=O)C[N+](CC5=CC=C([N+])([O-])=O)C=C5)CCCCC4</chem>                                   | 10.1021/jm0010062 | 715 | +2 | 1.397  |
| Gyermek1999-1  | C43H54Br2N2O6 | <chem>C[N@+](C@H)(CC1)([H])C[C@H]2OC(CCC(O[C@@H](C[C@@]3([H])CC4C[C@@]4([H])[N@+]3(C)C=C/CC5=CC(C=CC(OC)=C6)=C6C(OC)=C5)=O)([C@@]1([H])C2)CCC(C=C7)=CC(Br)=C7Br</chem> | WO9921854         | 852 | +2 | 0.525  |
| Gyermek1999-2  | C42H58N2O12   | <chem>C[N@+](C@H)(CC1)CC2OC(CCC(OC(C[C@@H]3CC4)C[C@@H]4[N@+]3(C)CC(C=C5OC)=CC(OC)=C5OC(C)=O)=O)([C@@H]1C2)CC(C=C6OC)=CC(OC)=C6OC(C)=O</chem>                           | WO9921854         | 782 | +2 | -4.784 |
| Gyermek1999-3  | C50H70N2O12   | <chem>C[N@+](C@H)(CC1)CC2OC(CCC(OC(C[C@H]3CC4)C[C@H]4[N@+]3(C)CC(C=CC(OC(CCC)=O)=C5)=C5OC(CCC)=O)=O)([C@@H]1C2)CC(C=CC(OC(CCC)=O)=C6)=C6OC(CCC)=O</chem>               | WO9921854         | 890 | +2 | -0.276 |
| Gyermek1999-4  | C46H62N2O12   | <chem>C[N@+](C@H)(CC1)CC2OC(CCC(OC(C[C@H]3CC4)C[C@H]4[N@+]3(C)CC(C=C5)=CC(OC(CC)=O)=C5OC(CC)=O)=O)([C@@H]1C2)CC(C=C6)=CC(OC(CC)=O)=C6OC(CC)=O</chem>                   | WO9921854         | 834 | +2 | -3.092 |
| Gyermek1999-5  | C36H48N4O10   | <chem>C[N@+](C@H)(CC1)CC2OC(CCC(OC(C[C@H]3CC4)C[C@H]4[N@+]3(C)CC(C=C5[N](=O)=O)=C(C=C5)OC)=O)([C@@H]1C2)CC(C=C6[N](=O)=O)=C(C=C6)OC</chem>                             | WO9921854         | 696 | +2 | -2.32  |
| Gyermek1999-6  | C42H58N2O12   | <chem>C[N@+](C@H)(CC1)CC2OC(CCC(OC(C[C@@H]3CC4)C[C@@H]4[N@+]3(C)CC(C=C5OC)=CC(OC)=C5OC(C)=O)=O)([C@@H]1C2)CC(C=C6OC)=CC(OC)=C6OC(C)=O</chem>                           | WO9921854         | 782 | +2 | -4.784 |
| Gyermek1999-7  | C38H48Cl2N2O8 | <chem>C[N@+](C@H)(CC1)CC2OC(CCC(OC(C[C@H]3CC4)C[C@H]4[N@+]3(C)CC(C=C5)=CC(Cl)=C5OC(C)=O)=O)([C@@H]1C2)CC(C=C6)=CC(Cl)=C6OC(C)=O</chem>                                 | WO9921854         | 730 | +2 | -2.30  |
| Gyermek1999-8  | C44H58N2O12   | <chem>C[N+](C(CC1)CC2OC(CCC(OC(CC3CC4)CC4[N+](C)CCC(C=C5)=CC(OC(C)=O)=C5OC(C)=O)=O)(C1C2)CCC(C=C6)=CC(OC(C)=O)=C6OC(C)=O</chem>                                        | WO9921854         | 806 | +2 | -6.25  |
| Gyermek1999-9  | C42H54N2O12   | <chem>C[N@+](C@H)(CC1)CC2OC(CCC(OC(C[C@H]3CC4)C[C@H]4[N@+]3(C)CC(C=C5OC(C)=O)=C(C=C5)OC(C)=O)=O)([C@H]1C2)CC(C=C6OC(C)=O)=C(C=C6)OC(C)=O</chem>                        | WO9921854         | 778 | +2 | -4.508 |
| Gyermek1999-10 | C40H54N2O10   | <chem>C[N@+](C@H)(CC1)CC2OC(CCC(OC(C[C@@H]3CC4)C[C@@H]4[N@+]3(C)CC(C=C5)=CC(OC)=C5OC(C)=O)=O)([C@@H]1C2)CC(C=C6)=CC(OC)=C6OC(C)=O</chem>                               | WO9921854         | 722 | +2 | -4.068 |

|                |             |                                                                                                                                                                                                                     |           |     |    |        |
|----------------|-------------|---------------------------------------------------------------------------------------------------------------------------------------------------------------------------------------------------------------------|-----------|-----|----|--------|
| Gyermek1999-11 | C40H58N2O10 | <chem>C[N@+](C[C@H](CC1)CC2OC(CCC(OC(C[C@H]3CC4)C[C@H]4[N@+]3(C)CC(C=C5OC)=CC(OC)=C5OC)=O)([C@H]1C2)CC(C=C6OC)=CC(OC)=C6OC</chem>                                                                                   | WO9921854 | 726 | +2 | -3.644 |
| Gyermek1999-12 | C42H62N2O8  | <chem>C[N@+](C[C@H](CC1)CC2OC(CCC(OC(C[C@H]3CC4)C[C@H]4[N@+]3(C)CC(C=C5)=CC(OC)=C5OC)=O)([C@H]1C2)CC(C=C6)=CC(OC)=C6OC</chem>                                                                                       | WO9921854 | 722 | +2 | -0.812 |
| Gyermek1999-13 | C40H50N2O8  | <chem>O=C(C1=CC(C(OC(C2)C(CC3)CC[N+]23CC(C=C4OC)=C(C=C4)OC)=O)=CC=C1)OC5C[N+]6(CCC5CC6)CC(C=C7OC)=C(C=C7)OC</chem>                                                                                                  | WO9921854 | 686 | +2 | 1.569  |
| Gyermek1999-14 | C57H86N2O12 | <chem>O=C(OC(CC1C)CC([N+](C)1CCC(C=C2)=CC(OC(CC)=O)=C2OC(CC)=O)C)CCCC3(CCCC3)CCCC(OC(CC4C)CC([N+](C)4CCC(C=C5)=CC(OC(CC)=O)=C5OC(CC)=O)C)=O</chem>                                                                  | WO9921854 | 990 | +2 | 0.757  |
| Gyermek1999-15 | C50H70N2O12 | <chem>C[N@@+](C[C@H](CC1)CC2OC(CCC(OC(C[C@H]3CC4)C[C@H]4[N@+]3(C)CCCC(C=C5)=CC(OC(CC)=O)=C5OC(CC)=O)=O)([C@@H]1C2)CCCC(C=C6)=CC(OC(CC)=O)=C6OC(CC)=O</chem>                                                         | WO9921854 | 890 | +2 | -3.376 |
| Gyermek1999-16 | C50H58N2O12 | <chem>C[N@@+](C[C@H](CC1)CC2OC(CCC(OC(C[C@H]3CC4)C[C@H]4[N@+]3(C)CC5=CC(C=CC=C6OC(C)=O)=C6C=C5OC(C)=O)=O)([C@@H]1C2)CC7=CC(C=CC=C8OC(C)=O)=C8C=C7OC(C)=O</chem>                                                     | WO9921854 | 878 | +2 | -2.254 |
| Gyermek1999-17 | C46H58N2O16 | <chem>C[N@+](C[C@H](CC1)CC2OC(CCC(OC(C[C@H]3CC4)C[C@H]4[N@+]3(C)CC(C=C5OC(C)=O)=CC(OC(C)=O)=C5OC(C)=O)=O)([C@H]1C2)CC(C=C6OC(C)=O)=CC(OC(C)=O)=C6OC(C)=O</chem>                                                     | WO9921854 | 894 | +2 | -7.064 |
| Gyermek1999-18 | C44H60N2O12 | <chem>C[N@@+](C[C@@](CC1)([H])C[C@@H]2OC(/C=C/C(O[C@@H](C[C@@]3([H])CC4)C[C@@]4([H])[N@+]3(C)CC(C=C5OC)=CC(OC)=C5OC(CC)=O)=O)([C@]1([H])C2)CC(C=C6OC)=CC(OC)=C6OC(CC)=O</chem>                                      | WO9921854 | 808 | +2 | -3.366 |
| Gyermek1999-19 | C48H64N2O12 | <chem>C[N@@+](C[C@@](CC1)([H])C[C@@H]2OC(C(CC3)C3C(O[C@@H](C[C@@]4([H])CC5)C[C@@]5([H])[N@+]4(C)CC(C=C6)=CC(OC(CC)=O)=C6OC(CC)=O)=O)([C@]1([H])C2)CC(C=C7)=CC(OC(CC)=O)=C7OC(CC)=O</chem>                           | WO9921854 | 860 | +2 | -2.808 |
| Gyermek1999-20 | C48H66N2O12 | <chem>C[N@@+](C[C@@](CC1)([H])C[C@@H]2OC(CCCCC(O[C@@H](C[C@@]3([H])CC4)C[C@@]4([H])[N@+]3(C)CC(C=C5)=CC(OC(CC)=O)=C5OC(CC)=O)=O)([C@]1([H])C2)CC(C=C6)=CC(OC(CC)=O)=C6OC(CC)=O</chem>                               | WO9921854 | 862 | +2 | -2.788 |
| Gyermek1999-21 | C47H64N2O12 | <chem>C[N@@+](C[C@@](CC1)([H])C[C@@H]2OC(CCCC(O[C@@H](C[C@@]3([H])CC4)C[C@@]4([H])[N@+]3(C)CC(C=C5)=CC(OC(C)=O)=C5OC(CC)=O)=O)([C@]1([H])C2)CC(C=C6)=CC(OC(C)=O)=C6OC(CC)=O</chem>                                  | WO9921854 | 848 | +2 | -2.737 |
| Gyermek1999-22 | C47H58N2O12 | <chem>C[N@@+](C[C@@](CC1)([H])C[C@H]2OC([C@@H]([C@@]3([H])C[C@]4([H])C=C3)[C@H]4C(O[C@H](C[C@@]5([H])CC6)C[C@@]6([H])[N@+]5(C)CC(C=C7)=CC(OC(C)=O)=C7OC(C)=O)=O)([C@]1([H])C2)CC(C=C8)=CC(OC(C)=O)=C8OC(C)=O</chem> | WO9921854 | 842 | +2 | -4.015 |
| Gyermek1999-23 | C43H56N2O12 | <chem>C[N@@+](C[C@@](CC1)([H])C[C@@H]2OC(CCCC(O[C@@H](C[C@@]3([H])C[C@H]4C(O[C@H](C[C@@]5([H])CC6)C[C@@]6([H])[N@+]5(C)CC(C=C7)=CC(OC(C)=O)=C7OC(C)=O)=O)([C@]1([H])C2)CC(C=C8)=CC(OC(C)=O)=C8OC(C)=O</chem>        | WO9921854 | 792 | +2 | -4.853 |

|                |             |                                                                                                                                                                                                                       |           |     |    |        |
|----------------|-------------|-----------------------------------------------------------------------------------------------------------------------------------------------------------------------------------------------------------------------|-----------|-----|----|--------|
|                |             | <chem>C@@]3([H])CC4C[C@@]4([H])[N@+]3(C)CC(C=C5)=CC(OC(C)=O)=C5OC(C=O)=O)O)([C@]1([H])C2CC(C=C6)=CC(OC(C)=O)=C6OC(C)=O</chem>                                                                                         |           |     |    |        |
| Gyermek1999-24 | C46H60N2O12 | <chem>C[N@@+](C[C@@](CC1)([H])C[C@@H]2OC(C(CCC3)CC3C(O[C@@H](C[C@@]4([H])CC5C[C@@@]5([H])[N@+]4(C)CC(C=C6)=CC(OC(C)=O)=C6OC(C=O)=O)O)([C@]1([H])C2CC(C=C7)=CC(OC(C)=O)=C7OC(C)=O</chem>                               | WO9921854 | 832 | +2 | -3.980 |
| Gyermek1999-25 | C44H58N2O12 | <chem>C[N@@+](C[C@@](CC1)([H])C[C@@H]2OC(C(CCC3)C3C(O[C@@H](C[C@@]4([H])[N@+](C)(C([H])CC4)CC(C=C5)=CC(OC(C)=O)=C5OC(C=O)C)=O)O)([C@]1([H])C2CC(C=C6)=CC(OC(C)=O)=C6OC(C)=O</chem>                                    | WO9921854 | 806 | +2 | -3.17  |
| Gyermek1999-26 | C47H58N2O12 | <chem>C[N@@+](C[C@@](CC1)([H])C[C@@H]2OC([C@@H]([C@@]3([H])C[C@@]4([H])C=C3)[C@H]4C(O[C@@H](C[C@@]5([H])CC6C[C@@]6([H])[N@+]5(C)CC(C=C7)=CC(OC(C)=O)=C7OC(C)=O)O)O)([C@]1([H])C2CC(C=C8)=CC(OC(C)=O)=C8OC(C)=O</chem> | WO9921854 | 842 | +2 | -4.015 |
| Gyermek1999-27 | C44H60N2O10 | <chem>C[N@@+](C[C@@](CC1)([H])C[C@@H]2OC(C(CCC3)CC3C(O[C@@H](C[C@@]4([H])CC5C[C@@@]5([H])[N@+]4(C)CC(C=C6)=CC(OC)=C6OC(C=O)=O)O)([C@]1([H])C2CC(C=C7)=CC(OC)=C7OC(C)=O</chem>                                         | WO9921854 | 776 | +2 | -2.84  |
| Gyermek1999-28 | C42H56N2O10 | <chem>C[N@@+](C[C@@](CC1)([H])C[C@@H]2OC(C(CCC3)C3C(O[C@@H](C[C@@]4([H])CC5C[C@@@]5([H])[N@+]4(C)CC(C=C6)=CC(OC)=C6OC(C=O)=O)O)([C@]1([H])C2CC(C=C7)=CC(OC)=C7OC(C)=O</chem>                                          | WO9921854 | 748 | +2 | -3.784 |
| Gyermek1999-29 | C45H58N2O10 | <chem>O=C([C@@H]([C@@]1([H])C[C@]2([H])C=C1)[C@H]2C(O[C@@H](C[C@@]3([H])CC4C[C@@@]4([H])[N@+]3(C)CC(C=C5)=CC(OC)=C5OC(C=O)=O)O[C@H](C[C@]6([H])CC7C[C@]7([H])[N@+]6(C)CC(C=C8)=CC(OC)=C8OC(C)=O</chem>                | WO9921854 | 786 | +2 | -2.875 |
| Gyermek1999-30 | C48H68N2O12 | <chem>C[N@@+](C[C@@](CC1)([H])C[C@@H]2OC(C(CCC3)CC3C(O[C@@H](C[C@@]4([H])CC5C[C@@@]5([H])[N@+]4(C)CC(C=C6OC)=CC(OC)=C6OC(CC)=O)O)O)([C@]1([H])C2CC(C=C7OC)=CC(OC)=C7OC(CC)=O</chem>                                   | WO9921854 | 864 | +2 | -2.498 |
| Gyermek1999-31 | C44H60N2O12 | <chem>C[N@@+](C[C@@](CC1)([H])C[C@@H]2OC(C(CCC3)C3C(O[C@@H](C[C@@]4([H])CC5C[C@@@]5([H])[N@+]4(C)CC(C=C6OC)=C(C(OC)=C6OC(C=O)=O)O)([C@]1([H])C2CC(C=C7OC)=CC(OC)=C7OC(C)=O</chem>                                     | WO9921854 | 808 | +2 | -4.50  |
| Gyermek1999-32 | C47H62N2O12 | <chem>O=C([C@@H]([C@@]1([H])C[C@]2([H])C=C1)[C@H]2C(O[C@@H](C[C@@]3([H])CC4C[C@@@]4([H])[N@+]3(C)CC(C=C5OC)=CC(OC)=C5OC(C=O)=O)O[C@H](C[C@]6([H])CC7C[C@]7([H])[N@+]6(C)CC(C=C8OC)=CC(OC)=C8OC(C)=O</chem>            | WO9921854 | 846 | +2 | -3.591 |
| Gyermek1999-33 | C47H68N2O12 | <chem>C[N@@+](C[C@@](CC1)([H])C[C@@H]2OC(CCCCCC(O[C@@H](C[C@@]3([H])CC4C[C@@@]4([H])[N@+]3(C)CC(C=C5OC)=CC(OC)=C5OC(C=O)=O)O)([C@]1([H])C2CC(C=C6OC)=CC(O</chem>                                                      | WO9921854 | 852 | +2 | -2.893 |

|                |             |                                                                                                                                                                                   |           |     |    |        |
|----------------|-------------|-----------------------------------------------------------------------------------------------------------------------------------------------------------------------------------|-----------|-----|----|--------|
|                |             | C)=C6OC(C)=O                                                                                                                                                                      |           |     |    |        |
| Gyermek1999-34 | C45H68N2O10 | C[N@@+](C@H)(CC1)[H]C[C@@H]2OC(CCCCCC(O[C@@H](C[C@@]3([H])CC4)C[C@@]4([H])[N@+](3(C)CC(C=C5OC)=CC(OC)=C5OC)=O)([C@]1([H])C2)CC(C=C6OC)=CC(OC)=C6OC                                | WO9921854 | 796 | +2 | -1.753 |
| Gyermek1999-35 | C43H58N2O8  | C[N@@+](C@H)(CC1)[H]C[C@@H]2OC([C@@H]([C@@]3([H])C[C@@]4([H])C=C3)[C@H]4C(O[C@@H](C[C@@]5([H])CC6C[C@@]6([H])[N@+](5(C)CC(C=C7OC)=C(C=C7)OC)=O)([C@]1([H])C2)CC(C=C8OC)=C(C=C8)OC | WO9921854 | 730 | +2 | -1.035 |
| Gyermek1999-36 | C50H68N2O12 | C[N@@+](C@H)(CCC1)CC2OC(C(C3)C3C(OC(C[C@@H]4CCCC5)C[C@@H]5[N@+](4(C)CC(C=C6)=CC(OC(CC)=O)=C6OC(CC)=O)=O)([C@@H]1C2)CC(C=C7)=CC(OC(CC)=O)=C7OC(CC)=O                               | WO9921854 | 888 | +2 | -1.69  |
| Gyermek1999-37 | C51H72N2O12 | C[N@@+](C@H)(CCC1)CC2OC(CCCCC(OC(C[C@@H]3CCC4)C[C@@H]4[N@+](3(C)CC(C=C5)=CC(OC(CC)=O)=C5OC(CC)=O)=O)([C@@H]1C2)CC(C=C6)=CC(OC(CC)=O)=C6OC(CC)=O                                   | WO9921854 | 904 | +2 | -1.141 |
| Gyermek1999-38 | C50H70N2O12 | C[N@+](C@H)(CCC1)CC2OC(CCCCC(OC(C[C@@H]3CCC4)C[C@@H]4[N@@+](3(C)CC(C=C5)=CC(OC(CC)=O)=C5OC(CC)=O)=O)([C@H]1C2)CC(C=C6)=CC(OC(CC)=O)=C6OC(CC)=O                                    | WO9921854 | 890 | +2 | -1.67  |
| Gyermek1999-39 | C49H68N2O12 | C[N@@+](C@H)(CCC1)CC2OC(CCCC(OC(C[C@@H]3CCC4)C[C@@H]4[N@+](3(C)CC(C=C5)=CC(OC(CC)=O)=C5OC(CC)=O)=O)([C@@H]1C2)CC(C=C6)=CC(OC(CC)=O)=C6OC(CC)=O                                    | WO9921854 | 876 | +2 | -1.619 |
| Gyermek1999-40 | C46H60N2O12 | C[N@+](C@H)(CCC1)CC2OC(C(C3)C3C(OC(C[C@@H]4CC(C5)C[C@@H]5[N@@+](4(C)CC(C=C6)=CC(OC(C)=O)=C6OC(C)=O)=O)([C@H]1C2)CC(C=C7)=CC(OC(C)=O)=C7OC(C)=O                                    | WO9921854 | 832 | +2 | -3.806 |
| Gyermek1999-41 | C48H66N2O12 | C[N@+](C@H)(CCC1)CC2OC(CCCCC(OC(C[C@@H]3CCC4)C[C@@H]4[N@@+](3(C)CC(C=C5)=CC(OC(C)=O)=C5OC(C)=O)=O)([C@H]1C2)CC(C=C6)=CC(OC(C)=O)=C6OC(C)=O                                        | WO9921854 | 862 | +2 | -2.728 |
| Gyermek1999-42 | C47H64N2O12 | C[N@@+](C@H)(CCC1)CC2OC(CCCCC(OC(C[C@@H]3CCC4)C[C@@H]4[N@+](3(C)CC(C=C5)=CC(OC(C)=O)=C5OC(C)=O)=O)([C@@H]1C2)CC(C=C6)=CC(OC(C)=O)=C6OC(C)=O                                       | WO9921854 | 848 | +2 | -3.257 |
| Gyermek1999-43 | C46H62N2O12 | C[N@+](C@H)(CCC1)CC2OC(CCCCC(OC(C[C@@H]3CCC4)C[C@@H]4[N@@+](3(C)CC(C=C5)=CC(OC(C)=O)=C5OC(C)=O)=O)([C@H]1C2)CC(C=C6)=CC(OC(C)=O)=C6OC(C)=O                                        | WO9921854 | 834 | +2 | -3.786 |
| Gyermek1999-44 | C45H60N2O12 | C[N@@+](C@H)(CCC1)CC2OC(CCCC(OC(C[C@@H]3CCC4)C[C@@H]4[N@+](3(C)CC(C=C5)=CC(OC(C)=O)=C5OC(C)=O)=O)([C@@H]1C2)CC(C=C6)=CC(OC(C)=O)=C6OC(C)=O                                        | WO9921854 | 820 | +2 | -3.735 |
| Gyermek1999-45 | C43H54N2O10 | O=C([C@@H]([C@]1([H])C[C@@]2([H])C=C1)[C@H]2C(OC(C3)C(CC4)CC[N+](34CC(C=C5)=CC(OC)=C5OC(C)=O)=O)OC(C6)C(CC7)CC[N+](67CC(C=C8)=CC(OC)=C8OC(C)=O                                    | WO9921854 | 758 | +2 | -0.325 |
| Gyermek1999-46 | C38H54N2O8  | C[N@@+](C@H)(CC1)CC2OC(CCC(OC(C[C@@H]3CC4)C[C@@H]4[N@+](3(C)CC(C=C5OC)=C(C=C5)OC)=O)([C@@H]1C2)CC(C=C6OC)=C(C=C6)OC                                                               | WO9921854 | 666 | +2 | -2.228 |

|                |              |                                                                                                                                                                            |                               |     |    |        |
|----------------|--------------|----------------------------------------------------------------------------------------------------------------------------------------------------------------------------|-------------------------------|-----|----|--------|
| Gyermek1999-47 | C40H58N2O10  | <chem>C[N+]([C@@H](CC1)CC2OC(CCC(OC(C[C@H]3CC4)C[C@H]4[N@+]3(C)CC(C=C5OC)=CC(OC=C5OC)=O)O)([C@H]1C2)CC(C=C6OC)=CC(OC)=C6OC</chem>                                          | WO9921854                     | 726 | +2 | -3.644 |
| Gyermek1999-48 | C42H54N2O12  | <chem>C[N@@+](C@@)(CC1)([H])C[C@@H]2OC(CCC(O[C@H](C[C@]3([H])CC4)C[C@]4([H])[N@@+]3(C)CC(C=C5)=CC(OC(C)=O=C5OC(C)=O)=O)([C@]1([H])C2)CC(C=C6)=CC(OC(C)=O)=C6OC(C)=O</chem> | WO9921854                     | 778 | +2 | -5.208 |
| Gyermek2002-1  | C41H60N2O6   | <chem>C[N+]1(C)C2CCC1CC(OC(C(C3=CC=CC=C3)COC(CCCCOC(C(OC4C5CCC(C4)[N+]5(C)C)=O)C6=CC=CC=C6)=O)C2</chem>                                                                    | 10.1016/s0163-7258(02)00296-6 | 676 | +2 | -3.911 |
| Gyermek2002-2  | C39H56N2O6   | <chem>C[N@+]1(C)CCCC[N@@+]2(C)C3CCC2C[C@@H](OC(C(C4=CC=CC=C4)CO)=O)C3)C5CCC1C[C@H](OC(C(C6=CC=CC=C6)CO)=O)C5</chem>                                                        | 10.1016/s0163-7258(02)00296-6 | 648 | +2 | -5.156 |
| Gyermek2002-3  | C44H66N2O6   | <chem>C[N@+]1(C)CCCCCCCC[N@@+]2(C)C3CCC2C[C@@H](OC(C(C4=CC=CC=C4)CO)=O)C3)C5CCC1C[C@H](OC(C(C6=CC=CC=C6)CO)=O)C5</chem>                                                    | 10.1016/s0163-7258(02)00296-6 | 718 | +2 | -2.512 |
| Gyermek2002-4  | C38H46N2O4   | <chem>C[N@+]1(C)C2=CC=C(C[N@@+]3(C)C4CCC3C[C@@H](OC(C5=CC=CC=C5)=O)C4)C=C2)C6CCC1C[C@H](OC(C7=CC=CC=C7)=O)C6</chem>                                                        | 10.1016/s0163-7258(02)00296-6 | 594 | +2 | -0.588 |
| Gyermek2002-5  | C40H50N2O6   | <chem>C[N@+]1(C)C2=CC=C(C[N@@+]3(C)C4CCC3C[C@@H](OC(C(C5=CC=CC=C5)O)=O)C4)C=C2)C6CCC1C[C@H](OC(C(C7=CC=C(C=C7)O)=O)C6</chem>                                               | 10.1016/s0163-7258(02)00296-6 | 654 | +2 | -2.699 |
| Gyermek2002-6  | C42H54N2O6   | <chem>C[N@+]1(C)C2=CC=C(C[N@@+]3(C)C4CCC3C[C@@H](OC(C(C5=CC=CC=C5)CO)=O)C4)C=C2)C6CCC1C[C@H](OC(C(C7=CC=CC=C7)CO)=O)C6</chem>                                              | 10.1016/s0163-7258(02)00296-6 | 682 | +2 | -2.956 |
| Gyermek2002-7  | C22H36N2O4   | <chem>C[N+]1(C)C2CCC1CC(OC(/C=C\OC3CC4CCC(C3)[N+]4(C)C)=O)O)C2</chem>                                                                                                      | 10.1016/s0163-7258(02)00296-6 | 392 | +2 | -7.12  |
| Gyermek2002-8  | C26H38N2O4   | <chem>C[N+]1(C)C2CCC1CC(OC(C3=CC=C(C(OC4CC5CCC(C4)[N+]5(C)C)=O)C=C3)=O)C2</chem>                                                                                           | 10.1016/s0163-7258(02)00296-6 | 442 | +2 | -5.824 |
| Gyermek2002-9  | C34H44N2O4   | <chem>C[N@@+]1(C)C2=CC=CC=C2)C3CCC1C[C@H](OC(/C=C\O[C@H]4CC5CCC(C4)[N@+]5(C)CC6=CC=CC=C6)=O)O)C3</chem>                                                                    | 10.1016/s0163-7258(02)00296-6 | 544 | +2 | -1.884 |
| Gyermek2002-10 | C38H44BrN2O4 | <chem>C[N@@+]1(C)C2=CC(Br)=CC=C2)C3CCC1C[C@H](OC(C4=CC=C(C(O[C@H]5CC6CCC(C5)[N@+]6(C)CC7=CC=CC(Br)=C7)O)=O)C4)=O)C3</chem>                                                 | 10.1016/s0163-7258(02)00296-6 | 750 | +2 | 1.138  |
| Gyermek2002-11 | C38H52N2O4   | <chem>C[N@@+]1(C)C2CCC1C[C@H](OC([C@@H]3C(C=CC=C4)=C4[C@](CC3)(C5=CC=CC=C5)C(O[C@H]6CC7CCC(C6)[N@+]7(C)C)=O)O)C2</chem>                                                    | 10.1016/s0163-7258(02)00296-6 | 600 | +2 | -3.416 |
| Gyermek2002-12 | C22H38N2O4   | <chem>C[N+]1(C)C2CCC1CC(OC(CCC(OC3CC4CCC(C3)[N+]4(C)C)=O)=O)C2</chem>                                                                                                      | 10.1016/s0163-7258(02)00296-6 | 394 | +2 | -7.84  |
| Gyermek2002-13 | C23H40N2O4   | <chem>C[N+]1(C)C2CCC1CC(OC(CCCC(OC3CC4CCC(C3)[N+]4(C)C)=O)=O)C2</chem>                                                                                                     | 10.1016/s0163-7258(02)00296-6 | 408 | +2 | -7.125 |
| Gyermek2002-14 | C24H42N2O4   | <chem>C[N+]1(C)C2CCC1CC(OC(CCCC(OC3CC4CCC(C3)[N+]4(C)C)=O)=O)C2</chem>                                                                                                     | 10.1016/s0163-7258(02)00296-6 | 422 | +2 | -7.176 |

|                |               |                                                                                                                    |                               |     |    |        |
|----------------|---------------|--------------------------------------------------------------------------------------------------------------------|-------------------------------|-----|----|--------|
| Gyermek2002-15 | C25H44N2O4    | C[N+](C)C2CCC1CC(OC(CCCCCC(OC3CC4CCC(C3)[N+](C)C)=O)=O)C2                                                          | 10.1016/s0163-7258(02)00296-6 | 436 | +2 | -6.647 |
| Gyermek2002-16 | C26H46N2O4    | C[N+](C)C2CCC1CC(OC(CCCCCC(OC3CC4CCC(C3)[N+](C)C)=O)=O)C2                                                          | 10.1016/s0163-7258(02)00296-6 | 450 | +2 | -6.118 |
| Gyermek2002-17 | C27H48N2O4    | C[N+](C)C2CCC1CC(OC(CCCCCC(OC3CC4CCC(C3)[N+](C)C)=O)=O)C2                                                          | 10.1016/s0163-7258(02)00296-6 | 464 | +2 | -5.589 |
| Gyermek2002-18 | C28H50N2O4    | C[N+](C)C2CCC1CC(OC(CCCCCC(OC3CC4CCC(C3)[N+](C)C)=O)=O)C2                                                          | 10.1016/s0163-7258(02)00296-6 | 478 | +2 | -5.06  |
| Gyermek2002-19 | C29H52N2O4    | C[N+](C)C2CCC1CC(OC(CCCCCC(OC3CC4CCC(C3)[N+](C)C)=O)=O)C2                                                          | 10.1016/s0163-7258(02)00296-6 | 492 | +2 | -4.531 |
| Gyermek2002-20 | C30H54N2O4    | C[N+](C)C2CCC1CC(OC(CCCCCC(OC3CC4CCC(C3)[N+](C)C)=O)=O)C2                                                          | 10.1016/s0163-7258(02)00296-6 | 506 | +2 | -4.002 |
| Gyermek2002-21 | C31H56N2O4    | C[N+](C)C2CCC1CC(OC(CCCCCC(OC3CC4CCC(C3)[N+](C)C)=O)=O)C2                                                          | 10.1016/s0163-7258(02)00296-6 | 520 | +2 | -2.473 |
| Gyermek2002-22 | C32H58N2O4    | C[N+](C)C2CCC1CC(OC(CCCCCC(OC3CC4CCC(C3)[N+](C)C)=O)=O)C2                                                          | 10.1016/s0163-7258(02)00296-6 | 534 | +2 | -2.944 |
| Gyermek2002-23 | C35H44Cl4N2O4 | C[N@@+](C)C2CCC1CC(OC(CCCCCC(OC3CC4CCC(C3)[N+](C)C)=O)=O)C2                                                        | 10.1016/s0163-7258(02)00296-6 | 696 | +2 | 0.963  |
| Gyermek2002-24 | C22H36NO8     | O=C(CCCCC(O)=O)OCC[N@+](C@H)(CC1)CC2OC(CCCCC(O)=O)(C@H)1C2)C                                                       | 10.1016/s0163-7258(02)00296-6 | 442 | +2 | -1.907 |
| Gyermek2002-25 | C22H42N2O4    | O=C(CCCCC(OCC[N+](CCCC1)C)=O)OCC[N+](CCCC2)C                                                                       | 10.1016/s0163-7258(02)00296-6 | 398 | +2 | -2.475 |
| Gyermek2002-26 | C34H50N2O4    | O=C(CCCCC(OCC[N+](CCCC1)CC2=CC=CC=C2)=O)OCC[N+](CCCC3)CC4=CC=CC=C4                                                 | 10.1016/s0163-7258(02)00296-6 | 550 | +2 | 2.278  |
| Gyermek2002-27 | C28H46N2O8    | CC(OCC[N@+](C@H)(CC1)CC2OC(CCC(OC(C@H)3CC4)C[C@H]4[N@+](C)CCOC(C)=O)=O)(C@H)1C2)C=O                                | 10.1016/s0163-7258(02)00296-6 | 538 | +2 | -4.433 |
| Gyermek2002-28 | C38H50N2O8    | O=C(C(OCC[N@+](C@H)(CC1)CC2OC(CC3=CC=CC=C3)=O)(C@H)1C2)C=O)OCC[N@+](C@H)(CC4)CC5OC(CC6=CC=C(C6)=O)(C@H)4C5)C       | 10.1016/s0163-7258(02)00296-6 | 662 | +2 | -1.588 |
| Gyermek2002-29 | C44H62N2O8    | O=C(CCCCCC(OCC[N@+](C@H)(CC1)CC2OC(CC3=CC=CC=C3)=O)(C@H)1C2)C=O)OCC[N@+](C@H)(CC4)CC5OC(CC6=CC=CC=C6)=O)(C@H)4C5)C | 10.1016/s0163-7258(02)00296-6 | 746 | +2 | 0.205  |
| Gyermek2002-30 | C44H62N2O8    | O=C(CCCCCC(OCC[N@+](C@H)(CC1)CC2OC(CC3=CC=CC=C3)=O)(C@H)1C2)C=O)OCC[N@+](C@H)(CC4)CC5OC(CC6=CC=CC=C6)=O)(C@H)4C5)C | 10.1016/s0163-7258(02)00296-6 | 746 | +2 | -1.211 |
| Gyermek2002-31 | C44H62N2O8    | O=C(CCCCCC(OCC[N@+](C@H)(CC1)CC2OC(CC3=CC=CC=C3)=O)(C@H)1C2)C=O)OCC[N@+](C@H)(CC4)CC5OC(CC6=CC=CC=C6)=O)(C@H)4C5)C | 10.1016/s0163-7258(02)00296-6 | 746 | +2 | 0.065  |
| Gyermek2002-32 | C41H56N2O8    | O=C(CCCCCC(OCC[N@+](C@H)(CC1)CC2OC(C3=CC=CC=C3)=O)(C@H)1C2)C=O)OCC[N@+](C@H)(CC4)CC5OC(CC6=CC=CC=C6)=O)(C@H)4C5)C  | 10.1016/s0163-7258(02)00296-6 | 704 | +2 | 0.258  |

|                |            |                                                                                                                                              |                               |     |    |        |
|----------------|------------|----------------------------------------------------------------------------------------------------------------------------------------------|-------------------------------|-----|----|--------|
| Gyermek2002-33 | C32H54N2O8 | O=C(CCCCCC(OCC[N@+](C@H)(CC1)CC2OC(C)=O)(C@@H]1C2)C)=O)OCC[N@+](C@H)(CC3)CC4OC(C)=O)(C@H]3C4)C                                               | 10.1016/s0163-7258(02)00296-6 | 594 | +2 | -3.071 |
| Gyermek2002-34 | C42H58N2O8 | O=C(CCC(OCCC[N@+](C@H)(CC1)CC2OC(CC3=CC=CC=C3)=O)(C@@H]1C2)C)=O)OCCC[N@+](C@H)(CC[C@H]4CC5)[C@@H]5OC(CC6=CC=CC=C6)=O)C                       | 10.1016/s0163-7258(02)00296-6 | 718 | +2 | 0.504  |
| Gyermek2002-35 | C42H58N2O8 | O=C(C(OCCCC[N@+](C@H)(CC1)CC2OC(CC3=CC=CC=C3)=O)(C@@H]1C2)C)=O)OCCCC[N@+](C@H)(CC4)CC5OC(CC6=CC=CC=C6)=O)(C@H]4C5)C                          | 10.1016/s0163-7258(02)00296-6 | 718 | +2 | -3.704 |
| Gyermek2002-36 | C30H50N2O8 | O=C(CCCCC(OCC[N@+](C@H)(CC1)CC2OC(C)=O)(C@@H]1C2)C)=O)OCC[N@+](C@H)(CC3)CC4OC(C)=O)(C@H]3C4)C                                                | 10.1016/s0163-7258(02)00296-6 | 566 | +2 | -4.129 |
| Gyermek2002-37 | C43H60N2O8 | O=C(CCCC(OCCC[N@+](C@H)(CC1)CC2OC(CC3=CC=CC=C3)=O)(C@@H]1C2)C)=O)OCCC[N@+](C@H)(CC4)CC5OC(C6=CC=CC=C6)=O)(C@H]4C5)C                          | 10.1016/s0163-7258(02)00296-6 | 732 | +2 | -1.16  |
| Gyermek2002-38 | C37H48N2O8 | O=C(C1=CC=CC=C1)OCC[N@+](C@H)(CC2)CC3OC(CC(O)C(C[C@H]4CC5)C[C@H]5[N@+](4)C)CCOC(C6=CC=CC=C6)=O)=O)(C@H]2C3)C                                 | 10.1016/s0163-7258(02)00296-6 | 648 | +2 | -1.339 |
| Gyermek2002-39 | C46H66N2O8 | O=C(CCCCCC(OCCC[N@+](C@H)(CC1)CC2OC(CC3=CC=CC=C3)=O)(C@H]1C2)C)=O)OCC[N@+](C@H)(CC4)CC5OC(CC6=CC=CC=C6)=O)(C@H]4C5)C                         | 10.1016/s0163-7258(02)00296-6 | 774 | +2 | -0.153 |
| Gyermek2002-40 | C40H54N2O8 | O=C(CCCCC(OCC[N@+](C@H)(CC1)CC2OC(C3=CC=CC=C3)=O)(C@@H]1C2)C)=O)OCC[N@+](C@H)(CC4)CC5OC(C6=CC=CC=C6)=O)(C@H]4C5)C                            | 10.1016/s0163-7258(02)00296-6 | 690 | +2 | -0.271 |
| Gyermek2002-41 | C41H56N2O8 | O=C(CC(OCCC[N@+](C@H)(CC1)CC2OC(CC3=CC=CC=C3)=O)(C@@H]1C2)C)=O)OCCC[N@+](C@H)(CC4)CC5OC(CC6=CC=CC=C6)=O)(C@H]4C5)C                           | 10.1016/s0163-7258(02)00296-6 | 704 | +2 | -1.87  |
| Gyermek2002-42 | C41H56N2O8 | O=C(CCCC(OCC[N@+](C@@)(CC1)([H])C[C@H]2OC(CC3=C=C=CC=C3)=O)(C@]1([H])C2)C)=O)OCC[N@+](C@@)(CC4)([H])C[C@H]5OC(CC6=CC=CC=C6)=O)(C@]4([H])C5)C | 10.1016/s0163-7258(02)00296-6 | 704 | +2 | -0.802 |
| Gyermek2002-43 | C39H52N2O8 | O=C(CC(OCC[N@+](C@@H)(CC1)CC2OC(CC3=CC=CC=C3)=O)(C@H]1C2)C)=O)OCC[N@+](C@H)(CC4)CC5OC(CC6=CC=CC=C6)=O)(C@H]4C5)C                             | 10.1016/s0163-7258(02)00296-6 | 676 | +2 | -1.512 |
| Gyermek2002-44 | C43H60N2O8 | O=C(CCCCC(OCC[N@+](C@H)(CC1)CC2OC(CC3=CC=CC=C3)=O)(C@@H]1C2)C)=O)OCC[N@+](C@H)(CC4)CC5OC(CC6=CC=CC=C6)=O)(C@H]4C5)C                          | 10.1016/s0163-7258(02)00296-6 | 732 | +2 | -0.324 |
| Gyermek2002-45 | C38H50N2O8 | O=C(CCC(OCC[N@+](C@H)(CC1)CC2OC(C3=CC=CC=C3)=O)(C@@H]1C2)C)=O)OCC[N@+](C@H)(CC4)CC5OC(C6=CC=CC=C6)=O)(C@H]4C5)C                              | 10.1016/s0163-7258(02)00296-6 | 662 | +2 | -0.575 |
| Gyermek2002-46 | C42H58N2O8 | O=C(CCCCC(OCC[N@+](C@H)(CC1)CC2OC(CC3=CC=CC=C3)=O)(C@@H]1C2)C)=O)OCC[N@+](C@H)(CC4)CC5OC(CC6=CC=CC=C6)=O)(C@H]4C5)C                          | 10.1016/s0163-7258(02)00296-6 | 718 | +2 | -0.853 |
| Gyermek2002-47 | C40H54N2O8 | O=C(CCC(OCC[N@+](C@H)(CC1)CC2OC(CC3=CC=CC=C3)=O)                                                                                             | 10.1016/s0163-                | 690 | +2 | -1.157 |

|                |            |                                                                   |                 |     |    |        |
|----------------|------------|-------------------------------------------------------------------|-----------------|-----|----|--------|
|                |            | <chem>([C@@H]1C2C)=O)OCC[N@+](C@H)(CC4)CC5OC(CC6=C</chem>         | 7258(02)00296-6 |     |    |        |
|                |            | <chem>C=CC=C6)=O)([C@H]4C5)C</chem>                               |                 |     |    |        |
| Gyermek2002-48 | C42H58N2O8 | <chem>O=C(CCCCCC(OCC[N@+](C@H)(CC1)CC2OC(C3=CC=CC=C3</chem>       | 10.1016/s0163-  | 718 | +2 | 0.787  |
|                |            | <chem>)=O)([C@@H]1C2C)=O)OCC[N@+](C@H)(CC4)CC5OC(C6</chem>        | 7258(02)00296-6 |     |    |        |
|                |            | <chem>=CC=CC=C6)=O)([C@H]4C5)C</chem>                             |                 |     |    |        |
| Gyermek2002-49 | C22H42N2O4 | <chem>O=C(CCCCC(OCC[N+](CCCCC1C)=O)OCC[N+](CCCCC2)C</chem>        | 10.1016/s0163-  | 398 | +2 | -2.475 |
|                |            |                                                                   | 7258(02)00296-6 |     |    |        |
| Gyermek2002-50 | C42H62N2O4 | <chem>C[N@+](C@H)(CC1)CC2OC(CC3=CC=CC=C3)=O)([C@H]1C2</chem>      | 10.1016/s0163-  | 658 | +2 | -0.726 |
|                |            | <chem>)CCCCCCCC[N@+](C@H)(CC4)CC5OC(CC6=CC=CC=C6)=O</chem>        | 7258(02)00296-6 |     |    |        |
|                |            | <chem>)([C@@H]4C5)C</chem>                                        |                 |     |    |        |
| Gyermek2002-51 | C28H54N2O2 | <chem>C[N@+](C@H)(CC1)([H])C[C@@H]2O)([C@]1([H])C2)CCCC</chem>    | 10.1016/s0163-  | 450 | +2 | -4.836 |
|                |            | <chem>CCCCCC[N@+](C@H)(CC3)([H])C[C@H]4O)([C@@]3([H])C4)C</chem>  | 7258(02)00296-6 |     |    |        |
| Gyermek2002-52 | C25H48N2O2 | <chem>C[N@+](C@H)(CC1)([H])C[C@@H]2O)([C@]1([H])C2)CCCC</chem>    | 10.1016/s0163-  | 408 | +2 | -6.423 |
|                |            | <chem>CCCC[N@+](C@H)(CC3)([H])C[C@H]4O)([C@@]3([H])C4)C</chem>    | 7258(02)00296-6 |     |    |        |
| Gyermek2002-53 | C24H46N2O2 | <chem>C[N@+](C@H)(CC1)([H])C[C@@H]2O)([C@]1([H])C2)CCCC</chem>    | 10.1016/s0163-  | 394 | +2 | -6.952 |
|                |            | <chem>CCC[N@+](C@H)(CC3)([H])C[C@H]4O)([C@@]3([H])C4)C</chem>     | 7258(02)00296-6 |     |    |        |
| Gyermek2002-54 | C23H44N2O2 | <chem>C[N@+](C@H)(CC1)([H])C[C@@H]2O)([C@]1([H])C2)CCCC</chem>    | 10.1016/s0163-  | 380 | +2 | -7.481 |
|                |            | <chem>CC[N@+](C@H)(CC3)([H])C[C@H]4O)([C@@]3([H])C4)C</chem>      | 7258(02)00296-6 |     |    |        |
| Gyermek2002-55 | C28H54N2   | <chem>C[N@+](C@H)2CC[C@@H]1CCC2)CCCCCCCCCCCC[N@@</chem>           | 10.1016/s0163-  | 418 | +2 | -0.662 |
|                |            | <chem>+](C@H)4CC[C@H]3CCC4)C</chem>                               | 7258(02)00296-6 |     |    |        |
| Gyermek2002-56 | C27H52N2   | <chem>C[N@+](C@H)2CC[C@@H]1CCC2)CCCCCCCCCCCC[N@@+</chem>          | 10.1016/s0163-  | 404 | +2 | -1.191 |
|                |            | <chem>](C@H)4CC[C@H]3CCC4)C</chem>                                | 7258(02)00296-6 |     |    |        |
| Gyermek2002-57 | C26H50N2   | <chem>C[N@+](C@H)2CC[C@@H]1CCC2)CCCCCCCCCCCC[N@@+](C@</chem>      | 10.1016/s0163-  | 390 | +2 | -1.72  |
|                |            | <chem>)(C@H)4CC[C@H]3CCC4)C</chem>                                | 7258(02)00296-6 |     |    |        |
| Gyermek2002-58 | C25H48N2   | <chem>C[N@+](C@H)2CC[C@@H]1CCC2)CCCCCCCCCCCC[N@@+](C@</chem>      | 10.1016/s0163-  | 376 | +2 | -2.249 |
|                |            | <chem>H)4CC[C@H]3CCC4)C</chem>                                    | 7258(02)00296-6 |     |    |        |
| Gyermek2002-59 | C24H46N2   | <chem>C[N@+](C@H)2CC[C@@H]1CCC2)CCCCCCCCCCCC[N@@+](C@</chem>      | 10.1016/s0163-  | 362 | +2 | -2.778 |
|                |            | <chem>@H)4CC[C@H]3CCC4)C</chem>                                   | 7258(02)00296-6 |     |    |        |
| Gyermek2002-60 | C23H44N2   | <chem>C[N@+](C@H)2CC[C@@H]1CCC2)CCCCCCCCCCCC[N@@+](C@</chem>      | 10.1016/s0163-  | 348 | +2 | -3.307 |
|                |            | <chem>@H)4CC[C@H]3CCC4)C</chem>                                   | 7258(02)00296-6 |     |    |        |
| Gyermek2002-61 | C22H42N2   | <chem>C[N@+](C@H)2CC[C@@H]1CCC2)CCCCCCCCCCCC[N@@+](C@</chem>      | 10.1016/s0163-  | 334 | +2 | -3.836 |
|                |            | <chem>@H)4CC[C@H]3CCC4)C</chem>                                   | 7258(02)00296-6 |     |    |        |
| Gyermek2002-62 | C21H40N2   | <chem>C[N@+](C@H)2CC[C@@H]1CCC2)CCCCCCCCCCCC[N@@+](C@H)4CC</chem> | 10.1016/s0163-  | 320 | +2 | -4.365 |
|                |            | <chem>[C@@H]3CCC4)C</chem>                                        | 7258(02)00296-6 |     |    |        |
| Gyermek2002-63 | C19H36N2   | <chem>C[N@+](C@H)2CCC[C@@H]1CC2)CCCC[N@+](C@H)4CC</chem>          | 10.1016/s0163-  | 292 | +2 | -3.943 |
|                |            | <chem>C[C@H]3CC4)C</chem>                                         | 7258(02)00296-6 |     |    |        |
| Gyermek2002-64 | C20H38N2   | <chem>C[N@+](C@H)2CCC[C@@H]1CC2)CCCC[N@+](C@H)4C</chem>           | 10.1016/s0163-  | 306 | +2 | -4.894 |
|                |            | <chem>CC[C@H]3CC4)C</chem>                                        | 7258(02)00296-6 |     |    |        |
| Gyermek2002-65 | C22H42N2O2 | <chem>C[N@+](C@H)(CC1)([H])C[C@H]2O)([C@]1([H])C2)CCCCC[</chem>   | 10.1016/s0163-  | 366 | +2 | -8.01  |
|                |            | <chem>N@@+](C@H)(CC3)([H])C[C@H]4O)([C@@]3([H])C4)C</chem>        | 7258(02)00296-6 |     |    |        |
| Gyermek2002-66 | C26H50N2O2 | <chem>C[N@+](C@H)(CC1)CC2O)([C@H]1C2)CCCCCCCCCCCC[N@+]</chem>     | 10.1016/s0163-  | 422 | +2 | -5.894 |
|                |            | <chem>([C@H](CC3)CC4O)([C@@H]3C4)C</chem>                         | 7258(02)00296-6 |     |    |        |



|                           |            |                                                                                                                                                    |                                |     |    |        |
|---------------------------|------------|----------------------------------------------------------------------------------------------------------------------------------------------------|--------------------------------|-----|----|--------|
| <b>Rocuronium</b>         | C32H53N2O4 | O=C(C)O[C@@H]([C@H]1[N+](CCCC2)CC=C)[C@](CC3)(C)[C@](C1)([H])[C@@](CC4)([H])[C@@]3([H])[C@@]([C@]4([H])C[C@@H]5O)(C)C[C@@H]5N6CCOCC6               | 10.2174/138955705402<br>3215   | 529 | +1 | 2.433  |
| <b>Vecuronium</b>         | C34H57N2O4 | C[C@]([C@H]1OC(C)=O)(CC2)[C@](C[C@@H]1[N+](C)CCCC3)([H])[C@@](CC4)([H])[C@@]2([H])[C@](C[C@@H]5N6CCC6)(C)[C@]4([H])C[C@@H]5OC(C)=O                 | 10.2174/138955705402<br>3215   | 557 | +1 | 4.334  |
| <b>Pipecuronium</b>       | C35H62N4O4 | C[C@]([C@H]1OC(C)=O)(CC2)[C@](C[C@@H]1N3CC[N+](C)(C)CC3)([H])[C@@](CC4)([H])[C@@]2([H])[C@](C[C@@H]5N6CC[N+](C)(C)CC6)(C)[C@]4([H])C[C@@H]5OC(C)=O | 10.2174/138955705402<br>3215   | 602 | +2 | 0.628  |
| <b>Pancuronium</b>        | C35H60N2O4 | C[C@]([C@H]1OC(C)=O)(CC2)[C@](C[C@@H]1[N+](C)CCCC3)([H])[C@@](CC4)([H])[C@@]2([H])[C@](C[C@@H]5[N+](C)CCCC6)(C)[C@]4([H])C[C@@H]5OC(C)=O           | 10.2174/138955705402<br>3215   | 572 | +2 | 1.206  |
| <b>Jindal2001-DPJ-489</b> | C32H54N2O2 | C[C@]12C(C[C@@H]([N+](C)CCCC3)CC2)=CCC4C1CC[C@@]5(C)C4C[C@H]([N+](C)CCCC6)[C@@H]5OC(C)=O                                                           | 10.1016/s0223-5234(00)01205-8  | 498 | +2 | -0.732 |
| <b>Jindal2002-DPJ-494</b> | C30H53N3O  | C[C@]12C(C[C@@H]([N+](C)CCCC3)CC2)=CCC4C1CC[C@@]5(C)C4C[C@H](N6CC[N+](C)(C)CC6)[C@@H]5O                                                            | 10.1016/s0223-5234(02)01413-7  | 471 | +2 | -1.923 |
| <b>Jindal2002-DPJ-496</b> | C32H55N3O2 | C[C@]12C(C[C@@H]([N+](C)CCCC3)CC2)=CCC4C1CC[C@@]5(C)C4C[C@H](N6CC[N+](C)(C)CC6)[C@@H]5OC(C)=O                                                      | 10.1016/s0223-5234(02)01413-7  | 513 | +2 | -1.021 |
| <b>Hu2012-8a</b>          | C29H52N2O3 | C[C@@]12C(CCC3C2CC[C@@]4(C)C3C[C@H]([N+](C)CCOCC5)[C@@H]4OC(C)=O)C[C@@H]([N+](C)(C)CC1                                                             | 10.1016/j.ejmech.2012.07.048   | 476 | +2 | -1.166 |
| <b>Hu2012-8b</b>          | C31H54N2O3 | C[C@@]12C(CCC3C2CC[C@@]4(C)C3C[C@H]([N+](C)CCOCC5)[C@@H]4OC(C)=O)C[C@@H]([N+](C)CCCC6)CC1                                                          | 10.1016/j.ejmech.2012.07.048   | 502 | +2 | 0.099  |
| <b>Hu2012-8c</b>          | C32H57N3O3 | C[C@@]12C(CCC3C2CC[C@@]4(C)C3C[C@H]([N+](C)CCOCC5)[C@@H]4OC(C)=O)C[C@@H](N6CC[N+](C)(C)CC6)CC1                                                     | 10.1016/j.ejmech.2012.07.048   | 531 | +2 | 1.565  |
| <b>Hu2012-8d</b>          | C32H56N2O3 | C[C@@]12C(CCC3C2CC[C@@]4(C)C3C[C@H]([N+](C)CCOCC5)[C@@H]4OC(C)=O)C[C@@H]([N+](C)CCCC6)CC1                                                          | 10.1016/j.ejmech.2012.07.048   | 516 | +2 | 0.658  |
| <b>Hu2012-8e</b>          | C31H54N2O4 | C[C@@]12C(CCC3C2CC[C@@]4(C)C3C[C@H]([N+](C)CCOCC5)[C@@H]4OC(C)=O)C[C@@H]([N+](C)CCOCC6)CC1                                                         | 10.1016/j.ejmech.2012.07.048   | 518 | +2 | 1.004  |
| <b>Hu2012-8f</b>          | C34H54N2O3 | C[C@@]12C(CCC3C2CC[C@@]4(C)C3C[C@H]([N+](C)CCOCC5)[C@@H]4OC(C)=O)C[C@@H]([N+](C)(C6=CC=CC=C6)C)CC1                                                 | 10.1016/j.ejmech.2012.07.048   | 538 | +2 | 1.594  |
| <b>Hu2012-8g</b>          | C35H56N2O3 | C[C@@]12C(CCC3C2CC[C@@]4(C)C3C[C@H]([N+](C)CCOCC5)[C@@H]4OC(C)=O)C[C@@H]([N+](C)(CC6=CC=CC=C6)C)CC1                                                | 10.1016/j.ejmech.2012.07.048   | 552 | +2 | 1.253  |
| <b>Hu2015-24a</b>         | C32H56N2O3 | C[C@@]12C(CCC3C2CC[C@@]4(C)C3C[C@H]([N+](C)CCCC5)[C@@H]4OC(C)=O)C[C@@H]([N+](C)CCOCC6)CC1                                                          | 10.1016/j.steroids.2015.01.008 | 516 | +2 | 0.658  |
| <b>Hu2015-24b</b>         | C31H54N2O3 | C[C@@]12C(CCC3C2CC[C@@]4(C)C3C[C@H]([N+](C)CCCC5)[C@@H]4OC(C)=O)C[C@@H]([N+](C)CCOCC6)CC1                                                          | 10.1016/j.steroids.2015.01.008 | 502 | +2 | 0.099  |
| <b>Hu2015-24c</b>         | C32H57N3O3 | C[C@@]12C(CCC3C2CC[C@@]4(C)C3C[C@H](N5CC[N+](C)(C)CC5)[C@@H]4OC(C)=O)C[C@@H]([N+](C)CCOCC6)CC1                                                     | 10.1016/j.steroids.2015.01.008 | 531 | +2 | 0.368  |
| <b>Hu2015-25a</b>         | C33H58N2O2 | C[C@@]12C(CCC3C2CC[C@@]4(C)C3C[C@H]([N+](C)CCCC5)[C@@H]4OC(C)=O)C[C@@H]([N+](C)CCCC6)CC1                                                           | 10.1016/j.steroids.2015.01.008 | 514 | +2 | 0.312  |

|                   |            |                                                                                                               |                                     |     |    |        |
|-------------------|------------|---------------------------------------------------------------------------------------------------------------|-------------------------------------|-----|----|--------|
| <b>Hu2015-25b</b> | C32H56N2O2 | C[C@@]12C(CCC3C2CC[C@@]4(C)C3C[C@H]([N+]5(C)CCCC5)<br>[C@@H]4OC(C)=O)C[C@@H]([N+]6(C)CCCC6)CC1                | 10.1016/j.ster-<br>oids.2015.01.008 | 500 | +2 | -0.248 |
| <b>Hu2015-25c</b> | C33H59N3O2 | C[C@@]12C(CCC3C2CC[C@@]4(C)C3C[C@H](N5CC[N+](C)(C)<br>CC5)[C@@H]4OC(C)=O)C[C@@H]([N+]6(C)CCCC6)CC1            | 10.1016/j.ster-<br>oids.2015.01.008 | 529 | +2 | 0.022  |
| <b>Hu2015-26a</b> | C32H56N2O2 | C[C@@]12C(CCC3C2CC[C@@]4(C)C3C[C@H]([N+]5(C)CCCC<br>5)[C@@H]4OC(C)=O)C[C@@H]([N+]6(C)CCCC6)CC1                | 10.1016/j.ster-<br>oids.2015.01.008 | 500 | +2 | -0.248 |
| <b>Hu2015-26b</b> | C31H54N2O2 | C[C@@]12C(CCC3C2CC[C@@]4(C)C3C[C@H]([N+]5(C)CCCC5)<br>[C@@H]4OC(C)=O)C[C@@H]([N+]6(C)CCCC6)CC1                | 10.1016/j.ster-<br>oids.2015.01.008 | 486 | +2 | -0.807 |
| <b>Hu2015-26c</b> | C32H57N3O2 | C[C@@]12C(CCC3C2CC[C@@]4(C)C3C[C@H](N5CC[N+](C)(C)<br>CC5)[C@@H]4OC(C)=O)C[C@@H]([N+]6(C)CCCC6)CC1            | 10.1016/j.ster-<br>oids.2015.01.008 | 515 | +2 | -0.537 |
| <b>Hu2015-27a</b> | C33H59N3O2 | C[C@@]12C(CCC3C2CC[C@@]4(C)C3C[C@H]([N+]5(C)CCCC<br>5)[C@@H]4OC(C)=O)C[C@@H](N6CC[N+](C)(C)CC6)CC1            | 10.1016/j.ster-<br>oids.2015.01.008 | 529 | +2 | 1.219  |
| <b>Hu2015-27b</b> | C32H57N3O2 | C[C@@]12C(CCC3C2CC[C@@]4(C)C3C[C@H]([N+]5(C)CCCC5)<br>[C@@H]4OC(C)=O)C[C@@H](N6CC[N+](C)(C)CC6)CC1            | 10.1016/j.ster-<br>oids.2015.01.008 | 515 | +2 | 0.660  |
| <b>Hu2015-27c</b> | C33H60N4O2 | C[C@@]12C(CCC3C2CC[C@@]4(C)C3C[C@H](N5CC[N+](C)(C)<br>CC5)[C@@H]4OC(C)=O)C[C@@H](N6CC[N+](C)(C)CC6)CC1        | 10.1016/j.ster-<br>oids.2015.01.008 | 544 | +2 | 0.929  |
| <b>Hu2015-28</b>  | C31H56N2O  | C[C@@]12C(CCC3C2CC[C@@]4(C)C3C[C@H]([N+]5(C)CCCC<br>5)[C@@H]4O)C[C@@H]([N+]6(C)CCCC6)CC1                      | 10.1016/j.ster-<br>oids.2015.01.008 | 472 | +2 | -0.591 |
| <b>Hu2015-29</b>  | C31H57N3O  | C[C@@]12C(CCC3C2CC[C@@]4(C)C3C[C@H](N5CC[N+](C)(C)<br>CC5)[C@@H]4O)C[C@@H]([N+]6(C)CCCC6)CC1                  | 10.1016/j.ster-<br>oids.2015.01.008 | 487 | +2 | -0.880 |
| <b>Hu2015-30</b>  | C30H49N3O2 | C[C@@]12C(CCC3C2CC[C@@]4(C)C3C[C@H](N5C=[N+](C)C=<br>C5)[C@@H]4OC(C)=O)C[C@@H]([N+]6(C)CCCC6)CC1              | 10.1016/j.ster-<br>oids.2015.01.008 | 483 | +2 | -2.523 |
| <b>Rao2016-1a</b> | C37H62N2O2 | C[C@@]12C(CCC3C2CC[C@@]4(C)C3C[C@H]([N+]5(CC=C)CC<br>CCC5)[C@@H]4OC(C)=O)C[C@@H]([N+]6(CC=C)CCCC6)CC1         | 10.1111/ebdd.12711                  | 566 | +2 | 1.860  |
| <b>Rao2016-1b</b> | C37H58N2O2 | C[C@@]12C(CCC3C2CC[C@@]4(C)C3C[C@H]([N+]5(CC#C)CC<br>CCC5)[C@@H]4OC(C)=O)C[C@@H]([N+]6(CC#C)CCCC6)CC1         | 10.1111/ebdd.12711                  | 562 | +2 | 0.512  |
| <b>Rao2016-1c</b> | C34H57N2O2 | C[C@@]12C(CCC3C2CC[C@@]4(C)C3C[C@H](N5CCCCC5)[C@<br>@H]4OC(C)=O)C[C@@H]([N+]6(CC=C)CCCC6)CC1                  | 10.1111/ebdd.12711                  | 525 | +1 | 4.214  |
| <b>Rao2016-1d</b> | C34H55N2O2 | C[C@@]12C(CCC3C2CC[C@@]4(C)C3C[C@H](N5CCCCC5)[C@<br>@H]4OC(C)=O)C[C@@H]([N+]6(CC#C)CCCC6)CC1                  | 10.1111/ebdd.12711                  | 523 | +1 | 3.540  |
| <b>Rao2016-2a</b> | C37H63N3O2 | C[C@@]12C(CCC3C2CC[C@@]4(C)C3C[C@H]([N+]5(CC=C)CC<br>CCC5)[C@@H]4OC(C)=O)C[C@@H](N6CC[N+](C)(CC=C)CC6)<br>CC1 | 10.1111/ebdd.12711                  | 581 | +2 | 2.767  |
| <b>Rao2016-2b</b> | C37H59N3O2 | C[C@@]12C(CCC3C2CC[C@@]4(C)C3C[C@H]([N+]5(CC#C)CC<br>CCC5)[C@@H]4OC(C)=O)C[C@@H](N6CC[N+](C)(CC#C)CC6)<br>C1  | 10.1111/ebdd.12711                  | 577 | +2 | 1.419  |
| <b>Rao2016-2c</b> | C34H58N3O2 | C[C@@]12C(CCC3C2CC[C@@]4(C)C3C[C@H](N5CCCCC5)[C@<br>@H]4OC(C)=O)C[C@@H](N6CC[N+](C)(CC=C)CC6)CC1              | 10.1111/ebdd.12711                  | 540 | +1 | 5.121  |
| <b>Rao2016-2d</b> | C34H56N3O2 | C[C@@]12C(CCC3C2CC[C@@]4(C)C3C[C@H](N5CCCCC5)[C@<br>@H]4OC(C)=O)C[C@@H](N6CC[N+](C)(CC#C)CC6)CC1              | 10.1111/ebdd.12711                  | 538 | +1 | 4.447  |
| <b>Rao2016-2e</b> | C38H60N3O2 | C[C@@]12C(CCC3C2CC[C@@]4(C)C3C[C@H](N5CCCCC5)[C@<br>@H]4OC(C)=O)C[C@@H](N6CC[N+](C)(CC7=CC=CC=C7)CC6)         | 10.1111/ebdd.12711                  | 590 | +1 | 6.650  |

|             |             |                                                                                                                                                    |                                  |      |    |       |  |
|-------------|-------------|----------------------------------------------------------------------------------------------------------------------------------------------------|----------------------------------|------|----|-------|--|
|             |             | CC1                                                                                                                                                |                                  |      |    |       |  |
| Rao2016-2f  | C39H63N3O2  | C[C@@]12C(CCC3C2CC[C@@]4(C)C3C[C@H]([N+]5(C)CCCC5)[C@@H]4OC(C)=O)C[C@@H](N6CC[N+](C)(CC7=CC=CC=C7)CC6)CC1                                          | 10.1111/ebdd.12711               | 605  | +2 | 3.522 |  |
| Rao2016-3a  | C37H63N3O2  | C[C@@]12C(CCC3C2CC[C@@]4(C)C3C[C@H](N5CC[N+](C)(C=C)CC5)[C@@H]4OC(C)=O)C[C@@H]([N+]6(CC=C)CCCCC6)CC1                                               | 10.1111/ebdd.12711               | 581  | +2 | 1.571 |  |
| Rao2016-3b  | C37H59N3O2  | C[C@@]12C(CCC3C2CC[C@@]4(C)C3C[C@H](N5CC[N+](C)(C=C#C)CC5)[C@@H]4OC(C)=O)C[C@@H]([N+]6(CC#C)CCCCC6)CC1                                             | 10.1111/ebdd.12711               | 577  | +2 | 0.222 |  |
| Rao2016-3c  | C34H58N3O2  | C[C@@]12C(CCC3C2CC[C@@]4(C)C3C[C@H](N5CC[N+](C)(C=C)CC5)[C@@H]4OC(C)=O)C[C@@H](N6CCCCC6)CC1                                                        | 10.1111/ebdd.12711               | 540  | +1 | 5.121 |  |
| Rao2016-3d  | C34H56N3O2  | C[C@@]12C(CCC3C2CC[C@@]4(C)C3C[C@H](N5CC[N+](C)(C=C#C)CC5)[C@@H]4OC(C)=O)C[C@@H](N6CCCCC6)CC1                                                      | 10.1111/ebdd.12711               | 538  | +1 | 4.447 |  |
| Rao2016-3e  | C38H60N3O2  | C[C@@]12C(CCC3C2CC[C@@]4(C)C3C[C@H](N5CC[N+](C)(C=C6=CC=CC=C6)CC5)[C@@H]4OC(C)=O)C[C@@H](N7CCCCC7)CC1                                              | 10.1111/ebdd.12711               | 590  | +1 | 6.650 |  |
| Rao2016-3f  | C39H63N3O2  | C[C@@]12C(CCC3C2CC[C@@]4(C)C3C[C@H](N5CC[N+](C)(C=C6=CC=CC=C6)CC5)[C@@H]4OC(C)=O)C[C@@H]([N+]7(C)CCCCC7)CC1                                        | 10.1111/ebdd.12711               | 605  | +2 | 2.326 |  |
| Rao2016-3g  | C45H67N3O2  | C[C@@]12C(CCC3C2CC[C@@]4(C)C3C[C@H](N5CC[N+](C)(C=C6=CC=CC=C6)CC5)[C@@H]4OC(C)=O)C[C@@H]([N+]7(CC8=CC=CC=C8)CCCCC7)CC1                             | 10.1111/ebdd.12711               | 681  | +2 | 4.944 |  |
| Rao2016-4a  | C37H64N4O2  | C[C@@]12C(CCC3C2CC[C@@]4(C)C3C[C@H](N5CC[N+](C)(C=C)CC5)[C@@H]4OC(C)=O)C[C@@H](N6CC[N+](C)(CC=C)C6)CC1                                             | 10.1111/ebdd.12711               | 596  | +2 | 2.478 |  |
| Rao2016-4b  | C37H60N4O2  | C[C@@]12C(CCC3C2CC[C@@]4(C)C3C[C@H](N5CC[N+](C)(C=C#C)CC5)[C@@H]4OC(C)=O)C[C@@H](N6CC[N+](C)(CC#C)CC6)CC1                                          | 10.1111/ebdd.12711               | 592  | +2 | 1.130 |  |
| Rao2016-4g  | C45H68N4O2  | C[C@@]12C(CCC3C2CC[C@@]4(C)C3C[C@H](N5CC[N+](C)(C=C6=CC=CC=C6)CC5)[C@@H]4OC(C)=O)C[C@@H](N7CC[N+](C)(CC8=CC=CC=C8)CC7)CC1                          | 10.1111/ebdd.12711               | 696  | +2 | 5.536 |  |
| CW 002      | C52H68N2O12 | O=C(OCCC[N@+]1(C)CCC(C=C(OC)C(OC)=C2)=C2[C@H]1CC3=CC(OC)=C(OC)C=C3)/C=C/C(OCCC[N@+]4(C)[C@H](CC5=C=C(OC)C(OC)=C5)C(C=C(OC)C(OC)=C6)=C6CC4)=O       | 10.1097/ALN.0b013e3<br>181dc1b5b | 912  | +2 | 2.663 |  |
| CW 011      | C53H70N2O13 | O=C(OCCC[N@+]1(C)CCC(C=C(OC)C(OC)=C2)=C2[C@H]1CC3=CC(OC)=C(OC)C=C3)/C=C/C(OCCC[N@+]4(C)[C@H](CC5=C=C(OC)=C(OC)C(OC)=C5)C(C=C(OC)C(OC)=C6)=C6CC4)=O | 10.1097/ALN.0b013e3<br>181dc1b5b | 942  | +2 | 2.305 |  |
| CW 1759-50  | C43H58N2O10 | COC1=C(OC)C=C2C([C@@H](CC3=CC=C(OC)C=C3)[N+])(C)(CCCOCC/C=C/C(OCCC[N+]4(CCOCC4)CC5=CC=C(OC)C(OC)=C5)=O)O)CC2)=C1                                   | 10.1097/ALN.0000000<br>000002408 | 762  | +2 | 2.268 |  |
| Patel1997-1 | C58H80N2O14 | O=C(CCCC/C=C/C(OCCC[N@+]([C@@H](C1=C2)CC(C=C3OC                                                                                                    | 10.1016/S0928-                   | 1028 | +2 | 3.121 |  |

|                |               |                                                                                                                                                                       |                                   |      |    |        |
|----------------|---------------|-----------------------------------------------------------------------------------------------------------------------------------------------------------------------|-----------------------------------|------|----|--------|
|                |               | )=CC(OC)=C3OC)(CCC1=CC(OC)=C2OC)C=O)OCCC[N@+](C<br>@@H](C(C4=C5)=CC(OC)=C5OC)CC(C=C6OC)=CC(OC)=C6OC)<br>(CC4)C                                                        | 0987(97)00020-1                   |      |    |        |
| Patel1997-4    | C60H88N2O16   | COC(C(OC)=CC(CC[N+](CCCCOC(CCCC/C=C/C(OCCC[N+](CCC(C=C1OC)=CC(OC)=C1OC)(C)CCC(C=C2OC)=CC(OC)=C2OC)=O<br>)=O)(C)CCC(C=C3OC)=CC(OC)=C3OC)=C4)=C4OC                      | 10.1016/S0928-<br>0987(97)00020-1 | 1092 | +2 | -0.256 |
| Patel1997-5    | C56H82N2O16   | COC(C(OC)=CC(CC[N+](CCCCOC(CCC(OCCC[N+](CCC(C=C1OC<br>)=CC(OC)=C1OC)(C)CCC(C=C2OC)=CC(OC)=C2OC)=O)=O)(C)C<br>CC(C=C3OC)=CC(OC)=C3OC)=C4)=C4OC                         | 10.1016/S0928-<br>0987(97)00020-1 | 1038 | +2 | -1.590 |
| Patel1997-6    | C60H88N2O14   | C[N+](CCCCOC(CC/C=C/C(CCC(OCCC[N+](C)(C)CCC(C=C1OC)=C(<br>C=C1OC)CCC(C=C2OC)=CC(OC)=C2OC)=O)=O)(C)CCC(C=C3O<br>C)=C(C=C3OC)CCC(C=C4OC)=CC(OC)=C4OC                    | 10.1016/S0928-<br>0987(97)00020-1 | 1060 | +2 | 0.902  |
| Patel1997-8    | C56H76N2O14   | O=C(CCCC/C=C/C(OCCC[N@+](C@H](C(C=C1OC)=CC(OC)=<br>C1OC)C2=CC(OC)=C3OC)(CCC2=C3)C)=O)OCCC[N@+](C@<br>H](C(C=C4OC)=CC(OC)=C4OC)C(C5=C6)=CC(OC)=C6OC)(CC5)<br>C         | 10.1016/S0928-<br>0987(97)00020-1 | 1000 | +2 | 2.363  |
| Patel1997-9    | C58H80N2O12S2 | O=C(CC/C=C/C(CCC(SCCC[N@+](C@H](C1=C2)CC(C=C3OC<br>)=CC(OC)=C3OC)(CCC1=CC(OC)=C2OC)C=O)SCCC[N@+](C<br>@@H](C(C4=C5)=CC(OC)=C5OC)CC(C=C6OC)=CC(OC)=C6OC)<br>(CC4)C     | 10.1016/S0928-<br>0987(97)00020-1 | 1060 | +2 | 3.741  |
| Patel1997-12   | C60H84N2O14   | CC(COC(CC/C=C/C(CCC(OCC(C)C[N@+](C@H](C1=C2)CC(C<br>=C3OC)=CC(OC)=C3OC)(CCC1=CC(OC)=C2OC)C=O)=O)C[N@<br>+]4(C@H](C(C(C4)=C5)=CC(OC)=C5OC)CC(C=C6OC)=CC(O<br>C)=C6OC)C | 10.1016/S0928-<br>0987(97)00020-1 | 1056 | +2 | 3.434  |
| Clara2020-m-1a | C24H34N4      | C[N+](CCCC1)CC2=CC(N=N/C3=CC(C[N+](4(C)CCCC4)=CC=C<br>3)=CC=C2                                                                                                        | 10.1016/j.ejmech.2020.<br>112403  | 378  | +2 | -2.202 |
| Clara2020-m-1b | C26H38N4      | C[N+](CCCC1)CC2=CC(N=N/C3=CC(C[N+](4(C)CCCC4)C)=CC<br>=C3)=CC=C2                                                                                                      | 10.1016/j.ejmech.2020.<br>112403  | 406  | +2 | -1.084 |
| Clara2020-m-1c | C28H42N4      | C[N+](CCCC1)CC2=CC(N=N/C3=CC(C[N+](4(C)CCCC4)C)=<br>CC=C3)=CC=C2                                                                                                      | 10.1016/j.ejmech.2020.<br>112403  | 434  | +2 | 0.034  |
| Clara2020-m-1d | C26H34N4      | C[N+](CC=CCC1)CC2=CC(N=N/C3=CC(C[N+](4(C)CCCC4)C)=<br>CC=C3)=CC=C2                                                                                                    | 10.1016/j.ejmech.2020.<br>112403  | 402  | +2 | -1.652 |
| Clara2020-p-1a | C24H34N4      | C[N+](CCCC1)CC2=CC=C(N=N/C3=CC=C(C[N+](4(C)CCCC4)C<br>=C3)C=C2                                                                                                        | 10.1016/j.ejmech.2020.<br>112403  | 378  | +2 | -2.202 |
| Clara2020-p-1b | C26H38N4      | C[N+](CCCC1)CC2=CC=C(N=N/C3=CC=C(C[N+](4(C)CCCC4)<br>C)C=C3)C=C2                                                                                                      | 10.1016/j.ejmech.2020.<br>112403  | 406  | +2 | -1.084 |
| Clara2020-p-1c | C28H42N4      | C[N+](CCCC1)CC2=CC=C(N=N/C3=CC=C(C[N+](4(C)CCCC<br>4)C)C=C3)C=C2                                                                                                      | 10.1016/j.ejmech.2020.<br>112403  | 434  | +2 | 0.034  |
| Clara2020-p-1d | C26H34N4      | C[N+](CC=CCC1)CC2=CC=C(N=N/C3=CC=C(C[N+](4(C)CCC=CC<br>4)C)C=C3)C=C2                                                                                                  | 10.1016/j.ejmech.2020.<br>112403  | 402  | +2 | -1.652 |
| Clara2020-m-5b | C19H24N3      | C[N+](CCCC1)CC2=CC=CC(N=N/C3=CC=CC=C3)=C2                                                                                                                             | 10.1016/j.ejmech.2020.<br>112403  | 294  | +2 | 1.383  |

|           |               |                                                                                                                                                                          |                  |      |    |       |
|-----------|---------------|--------------------------------------------------------------------------------------------------------------------------------------------------------------------------|------------------|------|----|-------|
| AV 391    | C54H71ClN2O15 | <chem>C[N+]1([C@@H](C(C=C2OC)=CC(OC)=C2OC)C(C(C1)=C3)=C(OC)C(OC)=C3OC)CCCOC/C(Cl)=C/C(OCCC[N+]1)(CCC4=C(C(OC)=C5OC)(C)[C@@H](C4=C5)CC(C=C6OC)=CC(OC)=C6OC)=O)=O</chem>   | asaabstracts.com | 1022 | +2 | 1.863 |
| AV 069    | C54H71FN2O15  | <chem>C[N+]1([C@@H](C(C=C2OC)=CC(OC)=C2OC)C(C(C1)=C3)=C(OC)C(OC)=C3OC)CCCOC/C(F)=C/C(OCCC[N+]1)(CCC4=C(C(OC)=C5OC)(C)[C@@H](C4=C5)CC(C=C6OC)=CC(OC)=C6OC)=O)=O</chem>    | asaabstracts.com | 1006 | +2 | 1.263 |
| NB 802-33 | C54H71ClN2O15 | <chem>C[N+]1([C@@H](C(C=C2OC)=CC(OC)=C2OC)C(C(C1)=C3)=CC(OC)=C3OC)CCCOC/C(Cl)=C/C(OCCC[N+]1)(CCC4=CC(O)C)=C5OC)(C)[C@@H](C4=C5OC)CC(C=C6OC)=CC(OC)=C6OC)=O)=O</chem>     | asaabstracts.com | 1022 | +2 | 1.863 |
| AV 001    | C53H70N2O14   | <chem>C[N+]1([C@@H](C(C=C2OC)=CC(OC)=C2OC)C(C(C1)=C3)=CC(OC)=C3OC)CCCOC/C=C/C(OCCC[N+]1)(CCC4=CC(OC)=C5OC)(C)[C@@H](C4=C5)CC(C=C6OC)=CC(OC)=C6OC)=O)=O</chem>            | asaabstracts.com | 958  | +2 | 1.568 |
| AV 003    | C51H66N2O12   | <chem>C[N+]1([C@@H](C(C=C2OC)=CC=C2OC)C(C(C1)=C3)=CC(O)C)=C3OC)CCCOC/C=C/C(OCCC[N+]1)(CCC4=CC(OC)=C5OC)(C)[C@@H](C4=C5)CC(C=C6OC)=CC=C6OC)=O)=O</chem>                   | asaabstracts.com | 898  | +2 | 2.284 |
| NB 720-71 | C55H73ClN2O16 | <chem>C[N+]1([C@@H](C(C=C2OC)=CC(OC)=C2OC)C(C(C1)=C3)=C(OC)C(OC)=C3OC)CCCOC/C(Cl)=C/C(OCCC[N+]1)(CCC4=C(C(OC)=C5OC)(C)[C@@H](C4=C5OC)CC(C=C6OC)=CC(OC)=C6OC)=O)=O</chem> | asaabstracts.com | 1052 | +2 | 1.505 |

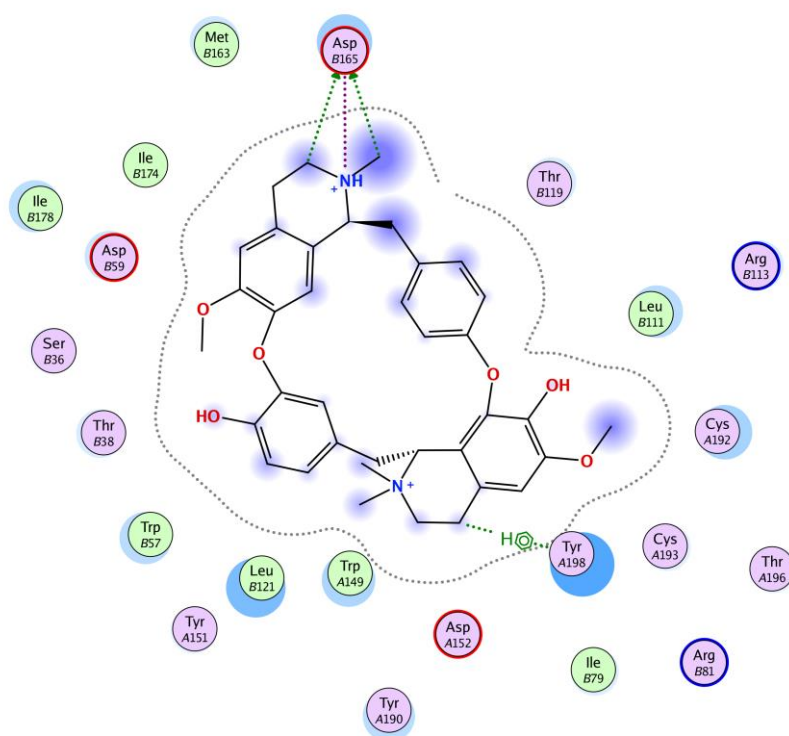

**Figure S1.** The binding modes of *d*-tubocurarine observed in the cryo-EM structure (PDB ID: 7SMS).
